1 **An Atlas of Gene Regulatory Elements in Adult Mouse Cerebrum**

2

3 Yang Eric Li<sup>1\*</sup>, Sebastian Preissl<sup>2\*</sup>, Xiaomeng Hou<sup>2</sup>, Ziyang Zhang<sup>1</sup>, Kai Zhang<sup>1</sup>, Rongxin  
4 Fang<sup>1</sup>, Yunjiang Qiu<sup>1</sup>, Olivier Poirion<sup>2</sup>, Bin Li<sup>1</sup>, Hanqing Liu<sup>3</sup>, Xinxin Wang<sup>2</sup>, Jee Yun Han<sup>2</sup>,  
5 Jacinta Lucero<sup>4</sup>, Yiming Yan<sup>1</sup>, Samantha Kuan<sup>1</sup>, David Gorkin<sup>2</sup>, Michael Nunn<sup>3</sup>, Eran A.  
6 Mukamel<sup>5</sup>, M. Margarita Behrens<sup>4</sup>, Joseph Ecker<sup>3,6</sup> and Bing Ren<sup>1,2,7</sup>

7

8 \*these authors contributed equally

9

10 <sup>1</sup>Ludwig Institute for Cancer Research, 9500 Gilman Drive, La Jolla, CA 92093, USA

11 <sup>2</sup>Center for Epigenomics, Department of Cellular and Molecular Medicine, University of  
12 California, San Diego, School of Medicine, La Jolla, CA, USA.

13 <sup>3</sup>Genomic Analysis Laboratory, The Salk Institute for Biological Studies, La Jolla, CA,  
14 92037, USA.

15 <sup>4</sup>Computational Neurobiology Laboratory, Salk Institute for Biological Studies, La Jolla,  
16 CA 92037, USA

17 <sup>5</sup>Department of Cognitive Science, University of California, San Diego, La Jolla, CA  
18 92037, USA.

19 <sup>6</sup>Howard Hughes Medical Institute, The Salk Institute for Biological Studies, La Jolla, CA,  
20 92037, USA.

21 <sup>7</sup>Institute of Genomic Medicine, Moores Cancer Center, University of California San  
22 Diego, School of Medicine, La Jolla, CA, USA.

23

24 Correspondence: Bing Ren ([biren@ucsd.edu](mailto:biren@ucsd.edu))

25 **ABSTRACT**

26 The mammalian cerebrum performs high level sensory, motor control and cognitive  
27 functions through highly specialized cortical networks and subcortical nuclei. Recent  
28 surveys of mouse and human brains with single cell transcriptomics<sup>1-3</sup> and high-  
29 throughput imaging technologies<sup>4,5</sup> have uncovered hundreds of neuronal cell types and  
30 a variety of non-neuronal cell types distributed in different brain regions, but the cell-type-  
31 specific transcriptional regulatory programs responsible for the unique identity and  
32 function of each brain cell type have yet to be elucidated. Here, we probe the accessible  
33 chromatin in >800,000 individual nuclei from 45 regions spanning the adult mouse  
34 isocortex, olfactory bulb, hippocampus and cerebral nuclei, and use the resulting data to  
35 define 491,818 candidate *cis* regulatory DNA elements in 160 distinct sub-types. We link  
36 a significant fraction of them to putative target genes expressed in diverse cerebral cell  
37 types and uncover transcriptional regulators involved in a broad spectrum of molecular  
38 and cellular pathways in different neuronal and glial cell populations. Our results provide  
39 a foundation for comprehensive analysis of gene regulatory programs of the mammalian  
40 brain and assist in the interpretation of non-coding risk variants associated with various  
41 neurological disease and traits in humans. To facilitate the dissemination of information,  
42 we have set up a web portal (<http://catlas.org/mousebrain>).

## 43 INTRODUCTION

44

45 In mammals, the cerebrum is the largest part of the brain and carries out essential  
46 functions such as sensory processing, motor control, emotion, and cognition<sup>6</sup>. It is divided  
47 into two hemispheres, each consisting of the cerebral cortex and various cerebral nuclei.  
48 The cerebral cortex is further divided into isocortex and allocortex. Isocortex,  
49 characterized by six cortical layers, is a phylogenetically more recent structure that has  
50 further expanded greatly in primates. It is responsible for sensory motor integration,  
51 decision making, volitional motor command and reasoning. The allocortex, by contrast, is  
52 phylogenetically the older structure that features three or four cortical layers. It includes  
53 the olfactory bulb responsible for processing the sense of smell and the hippocampus  
54 involved in learning, memory and spatial navigation.

55

56 The cerebral cortex and basal ganglia are made up of a vast number of neurons and glial  
57 cells. The neurons can be classified into different types of excitatory projection neurons  
58 and inhibitory interneurons, defined by the neural transmitters they produce and their  
59 connective patterns with other neurons<sup>7-9</sup>. Understanding how the identity and function of  
60 each brain cell type is established during development and modified by experience is one  
61 of the fundamental challenges in brain research. Recent single cell RNA-seq and high  
62 throughput imaging experiments have produced detailed cell atlases for both mouse and  
63 human brains<sup>3-5,10-15</sup>, leading to a comprehensive view of gene expression patterns in  
64 different brain regions, cell types and physiological states<sup>16-18</sup>. Despite these advances,  
65 the gene regulatory programs in most brain cell types have remained to be characterized.  
66 A major barrier to the understanding of cell-type specific transcriptional control is the lack  
67 of comprehensive maps of the regulatory elements in diverse brain cell types.

68

69 Transcriptional regulatory elements recruit transcription factors to exert control of target  
70 gene expression in *cis* in a cell-type dependent manner<sup>19</sup>. The regulatory activity of these  
71 elements is accompanied by open chromatin, specific histone modifications and DNA  
72 hypomethylation<sup>19</sup>. Exploiting these structural features, candidate *cis* regulatory elements  
73 (cCREs) have been mapped with the use of tools such as DNase-seq, ATAC-seq, ChIP-

74 seq and Whole genome bisulfite sequencing<sup>20,21</sup>. Conventional assays, typically  
75 performed using bulk tissue samples, unfortunately fail to resolve the cCREs in individual  
76 cell types comprising the extremely heterogeneous brain tissues. To overcome this  
77 limitation, single cell genomic technologies, such as single cell ATAC-seq, have been  
78 developed to enable analysis of open chromatin in individual cells<sup>22-28</sup>. These tools have  
79 been used to probe transcriptional regulatory elements in the prefrontal cortex<sup>28,29</sup>,  
80 cerebellum<sup>29</sup>, hippocampus<sup>30</sup>, forebrain<sup>31</sup> or the whole brain<sup>24,29</sup>, leading to identification  
81 of cell-type specific transcriptional regulatory sequences in these brain regions. These  
82 initial studies provided proof of principle for the use of single cell chromatin accessibility  
83 assays to resolve cell types and cell-type specific regulatory sequences in complex brain  
84 tissues, but the number of cells analyzed, and the *cis* regulatory elements identified so  
85 far are still limited.

86  
87 In the present study, as part of the BRAIN Initiative Cell Census Network, we conducted  
88 the most comprehensive analysis to date to identify candidate *cis* regulatory elements  
89 (cCRE) in the mammalian brain at single cell resolution. Using a semi-automated single  
90 nucleus ATAC-seq (snATAC-seq) procedure<sup>22,31</sup>, we mapped accessible chromatin in  
91 >800,000 cells from the mouse isocortex, hippocampus, olfactory bulb, and cerebral  
92 nuclei (including striatum and pallidum). We defined 160 sub-types based on the  
93 chromatin landscapes and matched 155 of them to previous cell taxonomy of the mouse  
94 brain<sup>1</sup>. We delineated the cell-type specificity for >490,000 cCREs that make up nearly  
95 14.8% of the mouse genome. We also integrated the chromatin accessibility data with  
96 available brain single cell RNA-seq data to assess their potential role in cell-type specific  
97 gene expression patterns, and gain mechanistic insights into the gene regulatory  
98 programs of different brain cell types. We further demonstrated that the human  
99 counterparts of the identified mouse brain cCREs are enriched for risk variants associated  
100 with neurological disease traits in a cell-type-specific and region-specific manner.

101

102

## 103 **RESULTS**

104

### 105 **Single cell analysis of chromatin accessibility of the adult mouse brain**

106

107 We performed snATAC-seq, also known as sci-ATAC-seq<sup>22,31</sup>, for 45 brain regions  
108 dissected from isocortex, olfactory bulb (OLF), hippocampus (HIP) and cerebral nuclei  
109 (CNU) (Fig. 1a, Extended Data Figure 1, Supplementary Table 1, see **Methods**) in 8-  
110 week-old male mice. Each dissection was made from 600  $\mu$ m thick coronal brain slices  
111 according to the Allen Brain Reference Atlas (Extended Data Figure 1)<sup>32</sup>. For each region,  
112 snATAC-seq libraries from two independent biological replicates were generated with a  
113 protocol<sup>31</sup> that had been optimized for automation (Fig. 1a, see **Methods**). The libraries  
114 were sequenced, and the reads were deconvoluted based on nucleus-specific barcode  
115 combinations. We confirmed that the dataset of each replicate met the quality control  
116 metrics (Extended Data Figure 2a-e, see **Methods**). We selected nuclei with at least  
117 1,000 sequenced fragments that displayed high enrichment ( $>10$ ) in the annotated  
118 transcriptional start sites (TSS; Extended Data Figure 2b). We also removed the snATAC-  
119 seq profiles likely resulting from potential barcode collision or doublets using a procedure  
120 modified from Scrublet<sup>33</sup> (Extended Data Figure. 2c, see **Methods**). Altogether, we  
121 obtained chromatin profiles from 813,799 nuclei with a median of 4,929 fragments per  
122 nucleus (Supplementary Table 2). Among them, 381,471 were from isocortex, 123,434  
123 from olfactory area, 147,338 from cerebral nuclei and 161,556 from hippocampus (Fig.  
124 1a, Extended Data Figure 2f). Thus, this dataset represents by far the largest number of  
125 chromatin accessibility profiles for these brain areas. Excellent correlation between  
126 datasets from similar brain regions (0.92-0.99 for isocortex; 0.89-0.98 for OLF; 0.79-0.98  
127 for CNU; 0.88-0.98 for hippocampus) and between biological replicates (0.98 in median,  
128 range from 0.95 to 0.99) indicated high reproducibility and robustness of the experiments  
129 (Extended Data Figure 2g).

130

### 131 **Clustering and annotation of mouse brain cells based on open chromatin** 132 **landscapes**

133

134 We carried out iterative clustering with the software package SnapATAC<sup>34</sup> to classify the  
135 813,799 snATAC-seq profiles into distinct cell groups based on the similarity of chromatin  
136 accessibility profiles (Fig. 1b-e, Supplementary Table 2 and 3, see **Methods**)<sup>34</sup>.  
137 SnapATAC clusters chromatin accessibility profiles using a nonlinear dimensionality  
138 reduction method that is highly robust to noise and perturbation<sup>34</sup>. We performed three  
139 iterative rounds of clustering, first separating cells into three broad classes, then into  
140 major types within each class, and finally into more sub-types. In the first iteration, we  
141 grouped cells into glutamatergic neurons (387,060 nuclei, 47.6%), GABAergic neurons  
142 (167,181 nuclei, 20.5%) and non-neuronal cells (259,588 nuclei, 31.9%; Fig. 1b-d). For  
143 each main cell class, we performed a second round of clustering. We identified a total of  
144 43 major types including distinct layer-specific cortical neurons, hippocampal granular  
145 cells (GRC) and striatal D1 and D2 medium spiny neurons (D1MSN, D2MSN; Fig 1b, d)  
146 which were annotated based on chromatin accessibility in promoters and gene bodies of  
147 known marker genes (Fig. 1e)<sup>1,3</sup>. Finally, for each major type we conducted another round  
148 of clustering to reveal sub-types. For example, *Lamp5*<sup>+</sup> neurons (LAMGA) and *Sst*<sup>+</sup>  
149 neurons (SSTGA) were further divided into sub-types (Fig. 1d, e, Supplementary Table  
150 3)<sup>3,35</sup>. One of the LAMGA subtypes showed accessibility at *Lhx6* and therefore might  
151 resemble an unusual transcriptomically defined putative chandelier-like cell type with  
152 features from caudal ganglionic and medial ganglionic eminence (Fig. 1b, e)<sup>3</sup>. Similarly,  
153 using this third layer clustering we found one SSTGA subpopulation with accessibility at  
154 *Chodl* locus which resembles long range projecting GABAergic neurons (Fig. 1b, e)<sup>35</sup>.  
155 Altogether, we were able to resolve 160 sub-types, with the number of nuclei in each  
156 group ranging from 93 to 75,474 and a median number of 5,086 nuclei per cluster  
157 (Supplementary Table 3).

158  
159 We constructed a hierarchical dendrogram to represent the relative similarity in chromatin  
160 landscapes among the 43 major cell groups (Fig. 1d, Extended Data Figure 3). This  
161 dendrogram captures known organizing principles of mammalian brain cells: Neurons are  
162 separated from non-neuronal types followed by separation of neurons based on  
163 neurotransmitter types (GABAergic versus glutamatergic) and finally into more specified  
164 cell types which might resemble the developmental origins (Fig. 1d)<sup>3</sup>. Consistent with

165 previous reports of brain cell types, we found that non-neuronal cells were broadly  
166 distributed in all regions while several classes of glutamatergic neurons and GABAergic  
167 neurons showed regional specificity (Fig. 1c, f, Extended Data Figure 4)<sup>3</sup>. We also found  
168 that glutamatergic neuron types showed more regional specificity than GABAergic types,  
169 consistent with transcriptomic analysis (Fig. 1c, f, Extended Data Figure 4)<sup>3</sup>.

170  
171 The chromatin-defined cell types matched well with the previously reported taxonomy  
172 based on transcriptomes and DNA methylomes<sup>3,36</sup> (see companion manuscript by Liu,  
173 Zhou et al.<sup>37</sup>). To directly compare our single nucleus chromatin-derived cell clusters with  
174 the single cell transcriptomics defined taxonomy of the mouse brain<sup>1</sup>, we first used the  
175 snATAC-seq data to impute RNA expression levels according to the chromatin  
176 accessibility of gene promoter and gene body as described previously (Seurat package<sup>38</sup>).  
177 We then performed integrative analysis with scRNA-seq data from matched brain regions  
178 of the Mouse Brain Atlas<sup>1</sup>. We found strong correspondence between the two modalities  
179 which was evidenced by co-embedding of both transcriptomic (T-type) and chromatin  
180 accessibility (A-type) cells in the same joint clusters (Fig. 2a-c, Supplementary Table 4,  
181 see **Methods**). For this analysis, we examined GABAergic neurons, glutamatergic  
182 neurons and non-neuronal cell classes separately (Fig. 2a-c, Supplementary Table 4, see  
183 **Methods**). For 155 of 160 types defined by snATAC-seq (A-Type), we could identify a  
184 corresponding cell cluster defined using scRNA-seq data (T-Type, Fig. 2d, e); conversely,  
185 for 84 out of 100 T-types we identified one, or in some cases more, corresponding A-  
186 types (Fig. 2d, f). Of note, two clusters fell into different classes. The Cajal-Retzius cells  
187 (CRC) was part of the GABAergic class in A-type but glutamatergic class in T-type and  
188 one small non-neuronal A-type cluster, VPIA3 (Vascular and leptomeningeal like cells)  
189 co-clustered with CRC T-type (Fig. 2d). Nevertheless, the general agreement between  
190 the open chromatin-based clustering and transcriptomics-based clustering laid the  
191 foundation for integrative analysis of cell-type specific gene regulatory programs in the  
192 mouse brain using single cell RNA and single nucleus chromatin accessibility assays, as  
193 for the mouse primary motor cortex<sup>15</sup>.

194

195 **Identification of cCREs in different mouse brain cell types**

196  
197 To identify the cCREs in each of the 160 A-types defined from chromatin landscapes, we  
198 aggregated the snATAC-seq profiles from the nuclei comprising each cell cluster and  
199 determined the open chromatin regions with MACS2<sup>39</sup>. We then selected the genomic  
200 regions mapped as accessible chromatin in both biological replicates, finding an average  
201 of 93,775 (range from 50,977 to 136,962) sites (500-bp in length) in each sub-type. We  
202 further selected the elements that were identified as open chromatin in a significant  
203 fraction of the cells in each sub-type (FDR >0.01, zero inflated Beta model, see **Methods**),  
204 resulting in a union of 491,818 open chromatin regions. These cCREs occupied 14.8% of  
205 the mouse genome (Supplementary Table 5 and 6).

206  
207 96.3% of the mapped cCREs were located at least 1 kbp away from annotated promoter  
208 regions of protein-coding and lncRNA genes (Gencode V16) (Fig. 3a)<sup>40</sup>. Several lines of  
209 evidence support the function of the identified cCREs. First, they largely overlapped with  
210 the DNase hypersensitive sites (DHS) previously mapped in a broad spectrum of bulk  
211 mouse tissues and developmental stages by the ENCODE consortium (Fig. 3b)<sup>41,42</sup>.  
212 Second, they generally showed higher levels of sequence conservation than random  
213 genomic regions with similar GC content (Fig 3c). Third, they were enriched for active  
214 chromatin states or potential insulator protein binding sites previously mapped with bulk  
215 analysis of mouse brain tissues (Fig. 3d)<sup>43-45</sup>.

216  
217 To define the cell-type specificity of the cCREs, we first plotted the median levels of  
218 chromatin accessibility against the maximum variation for each element (Fig 3e). We  
219 found that the majority of cCREs displayed highly variable levels of chromatin accessibility  
220 across the brain cell clusters identified in the current study, with the exception for 8,188  
221 regions that showed accessible chromatin in virtually all cell clusters (Fig 3e). The  
222 invariant cCREs were highly enriched for promoters (81%), with the remainder including  
223 CTC-binding factor (CTCF) binding sites and strong enhancers (Fig 3f). To more explicitly  
224 characterize the cell-type specificity of the cCREs, we used non-negative matrix  
225 factorization to group them into 42 modules, with elements in each module sharing similar  
226 cell-type specificity profiles. Except for the first module (M1) that included mostly cell-type



227 invariant cCREs, the remaining 41 modules displayed highly cell-type restricted  
228 accessibility (Fig. 3g, Supplementary Table 7, 8). These cell-type restricted modules were  
229 enriched for transcription factor motifs recognized by known transcriptional regulators for  
230 such as the SOX family factors for oligodendrocytes OGC (Supplementary Table 9)<sup>46,47</sup>.  
231 We also found strong enrichment for the known olfactory neuron regulator LIM homeobox  
232 factor LHX2 in module M5 which was associated with GABAergic neurons in the olfactory  
233 bulb (OBGA1) (Supplementary Table 9)<sup>48</sup>.

234

### 235 **Integrative analysis of chromatin accessibility and gene expression across mouse** 236 **brain cell types**

237

238 To dissect the transcriptional regulatory programs responsible for cell-type specific gene  
239 expression patterns in the mouse cerebrum, we carried out integrative analysis combining  
240 the single nucleus ATAC-seq collected in the current study with single cell RNA-seq data  
241 from matched brain regions<sup>1</sup>. Enhancers can be linked to putative target genes by  
242 measuring co-accessibility between enhancer and promoter regions of putative target  
243 genes and co-accessible sites tend to be in physical proximity in the nucleus<sup>49</sup>. Thus, we  
244 first identified pairs of co-accessible cCREs in each cell cluster using Cicero<sup>49</sup> and inferred  
245 candidate target promoters for distal cCRE located more than 1 kbp away from annotated  
246 transcription start sites in the mouse genome (Fig. 4a, see **Methods**)<sup>40</sup>. We determined  
247 a total of 813,638 pairs of cCREs within 500 kbp of each other, and connected 261,204  
248 cCREs to promoters of 12,722 genes (Supplementary Table 10).

249

250 Next, we sought to identify the subset of cCREs that might increase expression of putative  
251 target genes and therefore function as putative enhancers in neuronal or non-neuronal  
252 types. To this end, we first identified distal cCREs for which chromatin accessibility was  
253 correlated with transcriptional variation of the linked genes in the joint cell clusters as  
254 defined above (Fig. 2a). We computed Pearson correlation coefficients (PCC) between  
255 the normalized chromatin accessibility signals at each cCRE and the RNA expression of  
256 the predicted target genes across these cell clusters (Fig. 4a, b). As a control, we  
257 randomly shuffled the cCREs and the putative target genes and computed the PCC of

258 the shuffled cCRE-gene pairs (Fig. 4b, see **Methods**). This analysis revealed a total of  
259 129,404 pairs of positively correlated cCRE (putative enhancers) and genes at an  
260 empirically defined significance threshold of  $FDR < 0.01$  (Supplementary Table 10).  
261 These included 86,850 putative enhancers and 10,604 genes (Fig. 4b). The median  
262 distances between the putative enhancers and the target promoters was 178,911 bp (Fig.  
263 4c). Each promoter region was assigned to a median of 7 putative enhancers (Fig. 4d),  
264 and each putative enhancer was assigned to one gene on average. To investigate how  
265 the putative enhancers may direct cell-type specific gene expression, we further classified  
266 them into 38 modules, by applying non-negative matrix factorization to the matrix of  
267 normalized chromatin accessibility across the above joint cell clusters. The putative  
268 enhancers in each module displayed a similar pattern of chromatin accessibility across  
269 cell clusters to expression of putative target genes (Fig 4e, Supplementary Table 11 and  
270 13). This analysis revealed a large group of 12,740 putative enhancers linked to 6,373  
271 genes expressed at a higher level in all neuronal cell clusters than in all non-neuronal cell  
272 types (module M1, top, Fig. 4e). It also uncovered modules of enhancer-gene pairs that  
273 were active in a more restricted manner (modules M2 to M38, Fig 4e). For example,  
274 module M33 was associated with perivascular microglia (PVM). Genes linked to putative  
275 enhancers in this module were related to immune gene and the putative enhancers were  
276 enriched for the binding motif for ETS-factor PU.1, a known master transcriptional  
277 regulator of this cell lineage (Fig. 4e, f, Supplementary Table 13 and 14)<sup>50</sup>. Similarly,  
278 module M35 was strongly associated with oligodendrocytes (OGC) and the putative  
279 enhancers in this module were enriched for motifs recognized by the SOX family of  
280 transcription factors (Fig. 4e, f, Supplementary Table 14)<sup>47</sup>. We also identified module  
281 M15 associated with several cortical glutamatergic neurons (IT.L2/3,IT.L4,IT.L5/6,IT.L6),  
282 in which the putative enhancers were enriched for sequence motifs recognized by the  
283 bHLH factors NEUROD1 (Fig. 4e, f, Supplementary Table 14)<sup>51</sup>. Another example was  
284 module M10 associated with medium spiny neurons (MSN1 and 2), in which putative  
285 enhancers were enriched for motif for the MEIS factors, which play an important role in  
286 establishing the striatal inhibitory neurons (Fig. 4e, f, Supplementary Table 14)<sup>52</sup>. Notably  
287 and in stark contrast to the striking differences at putative enhancers, the chromatin  
288 accessibility at promoter regions showed little variation across cell types (Fig. 4g). This is

289 consistent with the paradigm that cell-type-specific gene expression patterns are largely  
290 established by distal enhancer elements<sup>42,53</sup>.

291  
292 **Distinct groups of transcription factors act at the enhancers and promoters in the**  
293 **pan-neuronal gene module**

294  
295 As shown above, genes associated with module M1 are preferentially expressed in both  
296 glutamatergic and GABAergic neurons, but not in glial cell types (Fig. 4e). *De novo* motif  
297 enrichment analysis of the 12,740 cCREs or putative enhancers in this module showed  
298 dramatic enrichment of sequence motifs recognized by the transcription factors CTCF,  
299 RFX, MEF2 (Supplementary Table 15), as well as many known motifs for other  
300 transcription factors (Fig. 4f, Fig. 5a, Supplementary Table 14). CTCF is a ubiquitously  
301 expressed DNA binding protein with a well-established role in transcriptional insulation  
302 and chromatin organization<sup>54</sup>. Recently, it was recognized that CTCF also promotes  
303 neurogenesis by binding to promoters and enhancers of proto-cadherin alpha gene  
304 cluster and facilitating enhancer-promoter contacts<sup>55,56</sup>. In the current study we found  
305 putative enhancers with CTCF motif for 2,601 genes that were broadly expressed in both  
306 inhibitory and excitatory neurons (Fig. 4e, 5b), and involved in multiple neural processes  
307 including axon guidance, regulation of axonogenesis, and synaptic transmission (Fig. 5c,  
308 Supplementary Table 16). For example, we found one CTCF peak overlapping a distal  
309 cCRE positively correlated with expression of *Lgi1* which encodes a protein involved in  
310 regulation of presynaptic transmission<sup>57</sup> (Fig 5d). The RFX family of transcription factors  
311 are best known to regulate the genes involved in cilium assembly pathways<sup>58</sup>.  
312 Unexpectedly, we found the RFX binding sequence motif to be strongly enriched at the  
313 putative enhancers for genes encoding proteins that participate in postsynaptic  
314 transmission, postsynaptic transmembrane potential, mitochondrion distribution, and  
315 receptor localization to synapse (Fig. 5c, Supplementary Table 16). For example, we  
316 found RFX motif in a distal cCRE positively correlated with expression of *Kif5a* which  
317 encodes a protein essential for GABA<sub>A</sub> receptor transport (Fig. 5e)<sup>59</sup>. This observation  
318 thus suggests a role for RFX family of transcription factors in regulation of synaptic  
319 transmission pathways in mammals. Similar to CTCF and RFX, the MEF2 family

320 transcription factors have also been shown to play roles in neurodevelopment and mental  
321 disorders<sup>60</sup>. Consistent with this, the genes associated with putative enhancers containing  
322 MEF2 binding motifs were selectively enriched for those participating in positive  
323 regulation of synaptic transmission, long-term synaptic potentiation, and axonogenesis  
324 (Fig. 5c, Supplementary Table 16). For example, we found a distal cCRE harboring a  
325 MEF2 motif positively correlated with expression of *Cacng2* which encodes a calcium  
326 channel subunit that is involved in regulating gating and trafficking of glutamate receptors  
327 (Fig 5f)<sup>61</sup>. Notably, in types with high accessibility levels, cCREs and promoters of putative  
328 target genes also showed low levels of DNA methylation (Fig. 5d-f, see companion  
329 manuscript by Liu, Zhou et al. 2020<sup>37</sup>).

330  
331 Interestingly, motif analysis of promoters of genes linked to cCREs in the module M1  
332 revealed the potential role of very different classes of transcription factors in neuronal  
333 gene expression. Among the top ranked transcription factor motifs are those recognized  
334 by CREB (cAMP-response elements binding protein), NF- $\kappa$ B, STAT3 and CLOCK  
335 transcription factors (Supplementary Table 17). Enrichment of CREB binding motif in  
336 module M1 gene promoters is consistent with its well-documented role in synaptic activity-  
337 dependent gene regulation and neural plasticity<sup>62,63</sup>. Enrichment of NF- $\kappa$ B<sup>64</sup>, STAT3<sup>65</sup>  
338 and CLOCK<sup>66</sup> binding motifs in the module M1 gene promoters is interesting, too, as it  
339 suggests potential roles for additional extrinsic signaling pathways, i.e. stress, interferon,  
340 circadian rhythm, respectively, in the regulation of gene expression in neurons.

341  
342 **Non-coding variants associated with neurological traits and diseases are enriched**  
343 **in the human orthologs of the mouse brain cCREs in a cell type-specific manner**

344  
345 Genome-wide association studies (GWASs) have identified genetic variants associated  
346 with many neurological disease and traits, but interpreting the results have been  
347 challenging because most variants are located in non-coding parts of the genome that  
348 often lack functional annotations and even when a non-coding regulatory sequence is  
349 annotated, its cell-type specificity is often not well known<sup>67,68</sup>. To test if our maps of  
350 cCREs in different mouse brain cell type could assist the interpretation of non-coding risk

351 variants of neurological diseases, we identified orthologs of the mouse cCREs in the  
352 human genome by performing reciprocal homology search<sup>69</sup>. For this analysis, we found  
353 that for 69.2% of the cCREs, human genome sequences with high similarity could be  
354 identified (> 50 % of bases lifted over to the human genome, Fig. 6a). Supporting the  
355 function of the human orthologs of the mouse brain cCREs, 83.0% of them overlapped  
356 with representative DNase hypersensitivity sites (rDHSs) in the human genome<sup>41,42</sup>. Next,  
357 we performed linkage disequilibrium (LD) score regression (LDSC)<sup>70</sup> to determine  
358 associations between different brain regions and distinct GWAS traits (Fig. 6b, Extended  
359 Data Figure 5). We found a significant enrichment of cCREs from 36 out of 45 brain  
360 regions for risk variants of Schizophrenia (Fig. 6b). In fact, most neurological traits  
361 showed widespread enrichment across brain regions, but a few like ADHD (Attention  
362 deficit hyperactivity disorder) showed some regional enrichment patterns (Fig. 6b).

363  
364 We also performed LDSC analysis and found significant associations between 20  
365 neuronal and non-neuronal traits and cCREs found in one or more major cell types (Fig.  
366 6c). We observed widespread and strong enrichment of genetic variants linked to  
367 psychiatric and cognitive traits such as major depressive disorder, intelligence,  
368 neuroticism, educational attainment, bipolar disorder and schizophrenia in cCREs across  
369 various neuronal cell types (Fig. 6c). Other neurological traits, such as attention deficit  
370 hyperactivity disorder, chronotype, autism spectrum disorder and insomnia were  
371 associated with specific neuronal cell-types in cerebral nuclei and hippocampus (Fig. 6c).  
372 Schizophrenia risk variants were not only enriched in cCREs in all excitatory neurons, but  
373 also in certain inhibitory neuron sub-types (Fig. 6c)<sup>71</sup>. The strongest enrichment of  
374 heritability for bipolar disorder was in elements mapped in excitatory neurons from  
375 isocortex (Fig. 6c). Risk variants of tobacco use disorder showed significant enrichment  
376 in the cell types from striatum, a cerebral nucleus previously implicated in addiction (Fig.  
377 6c)<sup>72</sup>. Interestingly, cCREs of non-neuronal mesenchymal cells were not enriched for  
378 neurological traits but showed enrichment for cardiovascular traits such as coronary  
379 artery disease (Fig. 6c). Similarly, variants associated with height were also significant in  
380 these cell types (Fig. 6c). cCREs in microglia were significantly enriched for variants  
381 related to immunological traits like inflammatory bowel disease, Crohn's disease and

382 multiple sclerosis (Fig. 6c). Notably, most of these patterns were not apparent in the peaks  
383 called on aggregated bulk profiles from brain regions (Fig. 6b, Extended Data Fig. 5),  
384 demonstrating the value of cell type resolved open chromatin maps which was also  
385 highlighted by a recent study using single cell ATAC-seq profiling of human brain which  
386 focusing on Alzheimers' and Parkinson's disease<sup>73</sup>.

387

## 388 **DISCUSSION**

389

390 Understanding the cellular and molecular genetic basis of brain circuit operations is one  
391 of the grand challenges in the 21<sup>st</sup> century<sup>12,74</sup>. In-depth knowledge of the transcriptional  
392 regulatory program in brain cells would not only improve our understanding of the  
393 molecular inner workings of neurons and non-neuronal cells, but could also shed new  
394 light into the pathogenesis of a spectrum of neuropsychiatric diseases<sup>75</sup>. In the current  
395 study, we report comprehensive profiling of chromatin accessibility at single cell resolution  
396 in the mouse cerebrum. The chromatin accessibility maps of 491,818 cCREs, probed in  
397 813,799 nuclei and 160 sub-types representing multiple cerebral cortical areas and  
398 subcortical structures, are the largest of its kind so far. The cell type annotation based on  
399 open chromatin landscape showed strong alignment with those defined based on single  
400 cell transcriptomics<sup>1</sup>, which allowed us to jointly analyse the two molecular modalities  
401 across major cell types in the brain and identify putative enhancers for over 10,604 genes  
402 expressed in the mouse cerebrum. We further characterized the cell-type-specific  
403 activities of putative enhancers, inferred their potential target genes, and predicted  
404 transcription factors that act through these candidate enhancers to regulate specific gene  
405 modules and molecular pathways.

406

407 We identified one large group of putative enhancers for genes that are broadly expressed  
408 in GABAergic and glutamatergic neurons, but at low levels or are silenced in all glial cell  
409 types. A significant fraction of these cCREs are bound by CTCF in the mouse brain  
410 (Figure 5)<sup>43</sup>. Recently, it was shown that CTCF is involved in promoter selection in the  
411 proto-cadherin gene cluster by promoting enhancer-promoter looping<sup>55,56</sup>. Our data now  
412 suggest that CTCF could regulate a broader set of neuronal genes than previously

413 demonstrated<sup>55,76</sup>, which need to be verified in future experiments. In addition, the RFX  
414 family of transcription factors was described to regulate cilia in sensory neurons<sup>58</sup>. Our  
415 data suggest a more widespread role for RFX family of transcription factors in the brain  
416 in regulation of synaptic transmission. Consistent with this proposal, deletion of *Rfx4*  
417 gene in mouse was shown to severely disrupt neural development<sup>77</sup>. We have previously  
418 shown that RFX motif was enriched in elements that were more accessible after birth  
419 compared to prenatal time points in both GABAergic and glutamatergic neuronal types<sup>31</sup>.  
420 RFX was also found to be strongly enriched in mouse forebrain enhancers with increased  
421 activity after birth<sup>78</sup>. Similar to CTCF and RFX, the MEF2 family transcription factors have  
422 been demonstrated to play roles in neurodevelopment and mental disorders<sup>60</sup>. The MEF2  
423 motif was enriched at enhancers with higher chromatin accessibility in late forebrain  
424 development in mice coinciding with synapse formation<sup>78</sup>.

425  
426 Thus, our results are consistent with the notion that cell identity is encoded in distal  
427 enhancer sequences, executed by sequence-specific transcription factors during different  
428 stages of brain development. The reference maps of cCREs for the mouse cerebrum  
429 would not only help to understand the mechanisms of gene regulation in different brain  
430 cell types, but also enable targeting and purification of specific neuronal or non-neuronal  
431 cell types or targeted gene therapy<sup>28,79</sup>. In addition, the maps of cCREs in the mouse  
432 brain would also assist the interpretation of non-coding risk variants associated with  
433 neurological diseases<sup>73</sup>. The datasets described here represent a rich resource for the  
434 neuroscience community to understand the molecular patterns underlying diversification  
435 of brain cell types in complementation to other molecular and anatomical data.

436 **ACKNOWLEDGEMENTS**

437 We thank Josh Huang (CSHL) for critical reading of the manuscript. We thank Drs. Ramya  
438 Raviram, Yanxiao Zhang, Guoqiang Li and James Hocker for discussions and all other  
439 members of the Ren laboratory for valuable inputs. We would like to extend our gratitude  
440 to the QB3 Macrolab at UC Berkeley for purification of the Tn5 transposase. This study  
441 was supported by NIH Grant U19MH11483. Work at the Center for Epigenomics was also  
442 supported by the UC San Diego School of Medicine.

443

444 **AUTHOR CONTRIBUTIONS**

445 Study was conceived by: B.R., M.M.B., J.R.E, Study supervision: B.R., Contribution to  
446 data generation: S.P., X.H., J.Y.H., X.W., D.G., S.K., J.L., M.M.B., Contribution to data  
447 analysis: Y.E.L., K.Z., Z.Z., R.F., Y.Q., O.P., Y.Y., H.L., E.A.M., Contribution to web portal:  
448 Y.E.L., Z.Z., B.L., Contribution to data interpretation: Y.E.L., S.P., B.R., J.R.E., M.B.,  
449 E.A.M., Contribution to writing the manuscript: Y.E.L., S.P., B.R. All authors edited and  
450 approved the manuscript.

451

452 **COMPETING INTERESTS**

453 B.R. is a co-founder and consultant of Arima Genomics, Inc.. J.R.E is on the scientific  
454 advisory board of Zymo Research, Inc



Figure 1

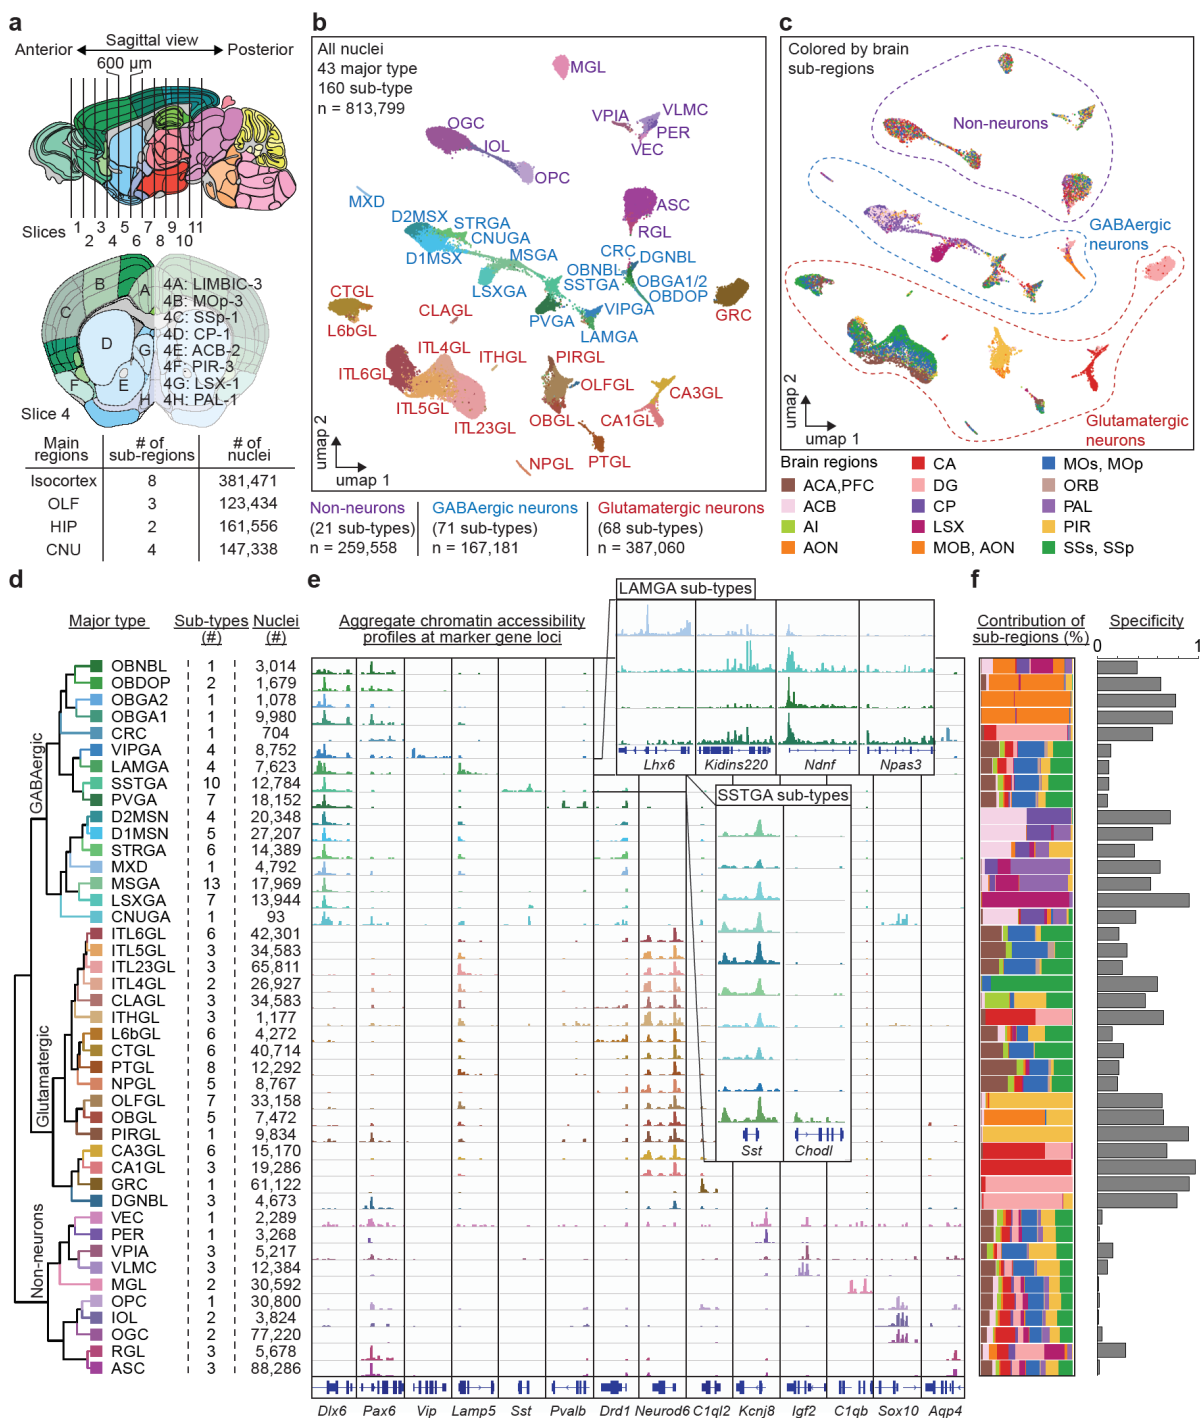

455  
456 **Figure 1: Chromatin accessibility profiling, clustering and annotation of over**  
457 **800,000 nuclei in adult mouse cerebrum.**  
458 **a** Schematic of sample dissection strategy. The brain regions studied were dissected from  
459 600 μm-thick coronal slices generated from 8-week-old mouse brains (top panel). A total

460 of 45 regions were dissected according to the Allen reference atlas. Shown is the frontal  
461 view of slice 4 and the dissected brain regions (middle panel, alphabetically labeled). For  
462 example, dissection region 4B: MOp-3 denotes part 3 of the primary motor cortex (MOp)  
463 region which corresponds to region B from slice 4. The dissected regions represent 17  
464 sub regions from four main brain areas: isocortex, olfactory bulb (OLF), hippocampus  
465 (HIP) and cerebral nuclei (CNU). A detailed list of regions can be found in Supplementary  
466 Table 1. **b** Uniform manifold approximation and projection (UMAP)<sup>80</sup> embedding and  
467 clustering analysis of snATAC-seq data from 813,799 nuclei, revealing 43 major types  
468 and 160 sub-types assigned to non-neuronal (21, purple), GABAergic (71, blue/green)  
469 and Glutamatergic neuron clusters (68, red/brown). Clusters were annotated based on  
470 chromatin accessibility at promoter regions and gene bodies of canonical marker genes.  
471 Each dot in the UMAP represents a nucleus and the nuclei are colored and labeled by  
472 major cluster ID. For example, ITL23GL denotes excitatory neurons from cortex layer 2/3.  
473 For a full list and description of cluster labels see Supplementary Table 3. **c** Same  
474 embedding as in **b** but colored by sub-regions, e.g. SSp (primary somatosensory cortex).  
475 For a full list of brain regions see Supplementary Table 1. Dotted lines demark major cell  
476 classes. **d** Hierarchical organization of cell clusters based on chromatin accessibility  
477 depicting level 1 and 2 clusters (left panel). Each major type represents 1-10 sub-types  
478 (middle). Total number of nuclei per major type ranged from 93 to 88,286 nuclei (right).  
479 For a full list and description of cluster labels see Supplementary Table 2. **e** Genome  
480 browser tracks of aggregate chromatin accessibility profiles for each major cell cluster at  
481 selected marker gene loci that were used for cell cluster annotation. The inlets highlight  
482 the 10 subtypes of *Sst+* (SSTGA) inhibitory neurons including *Chodl-Nos1* neurons  
483 (bottom track in SSTGA inlet)<sup>35</sup> and 4 subtypes of *Lamp5+* (LAMGA) inhibitory neurons  
484 including *Lhx6* positive putative chandelier like cells (top track in LAMGA inlet)<sup>3</sup>. For a full  
485 list and description of cluster labels see Supplementary Table 3. **f** Bar chart representing  
486 the relative contributions of sub-regions to major clusters. Color code is the same as in **b**.  
487 Based on these relative contributions, an entropy-based specificity score was calculated  
488 to indicate if a cluster was restricted to one or a few of the profiled regions (high score) or  
489 broadly distributed (low score). Several neuronal types showed high regional specificity  
490 whereas non-neuronal types were mostly unspecific. Glutamatergic neurons showed

491 higher regional specificity than GABAergic neurons consistent with transcriptomic  
492 analysis<sup>3</sup>.

Figure 2

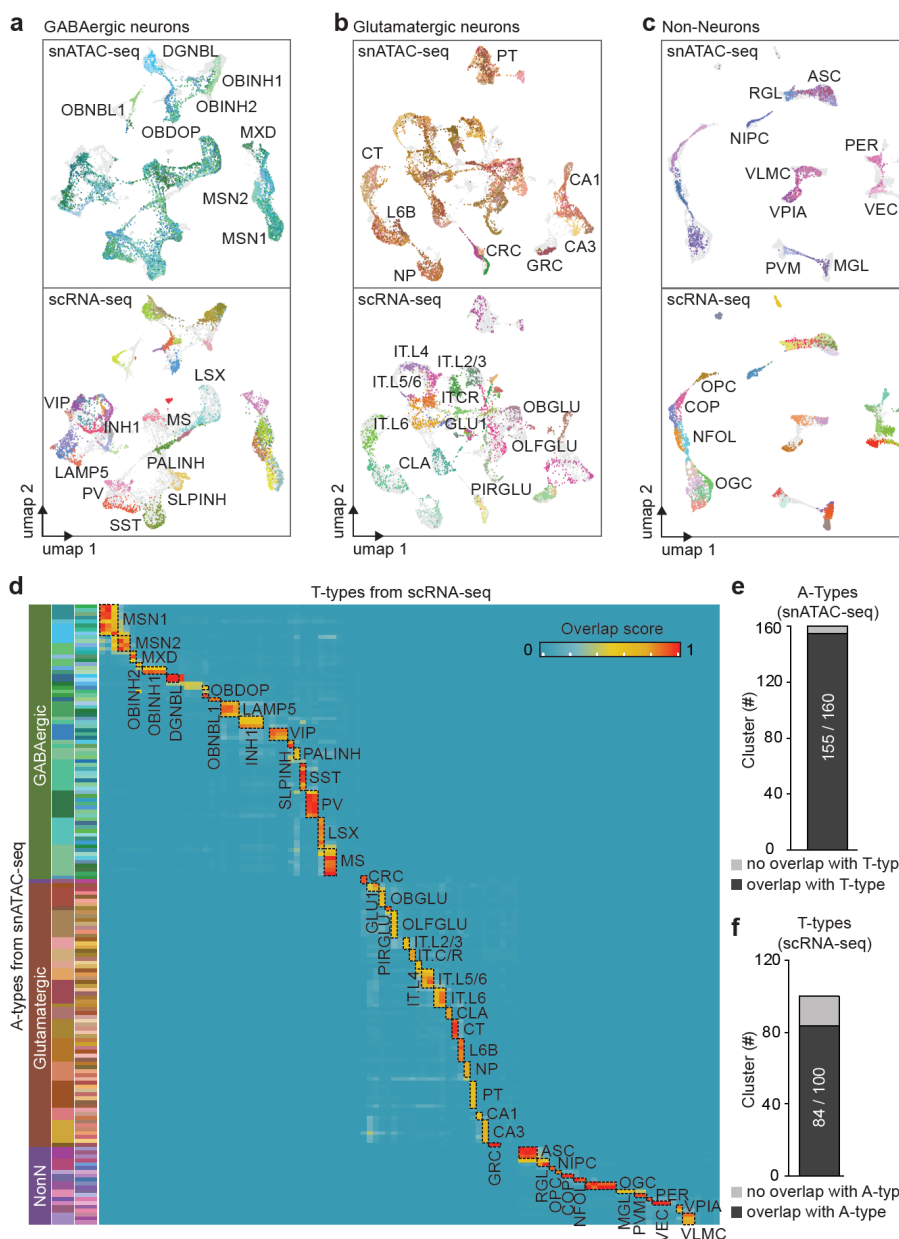

493  
 494 **Figure 2: Alignment of chromatin-based cell clustering to scRNA-seq-based cell**  
 495 **type taxonomy.**  
 496 **a-c** SnATAC-seq data were integrated with scRNA-seq profiles from matched brain  
 497 regions<sup>1</sup> using the Seurat package<sup>38</sup>. Uniform manifold approximation and projections  
 498 (UMAPs)<sup>80</sup> illustrate co-embedding of snATAC-seq and scRNA-seq datasets from three  
 499 main cell classes, namely **c** GABAergic neurons, **d** glutamatergic neurons, and **e** non-  
 500 neurons (top: colored by snATAC-seq clusters (A-type), bottom: colored by scRNA-seq

501 clusters (T-type); labelling denotes integrated A/T-types). **d** Heatmap illustrating the  
502 overlap between A-type and T-type cell cluster annotations. Each row represents a  
503 snATAC-seq sub-type (total of 160 A-types) and each column represents scRNA-seq  
504 cluster (total of 100 T-types). The overlap between original clusters and the joint cluster  
505 was calculated (overlap score) and plotted on the heatmap. Joint clusters with an overlap  
506 score of  $>0.5$  are highlighted using black dashed line and labeled with joint cluster ID. For  
507 a full list of cell type labels and description see Supplementary Table 4. **e, f** Bar plots  
508 indicating the number of clusters that overlapped (dark grey) and that did not overlap (light  
509 grey) with clusters from the other modality. **e** 155 out of 160 A-types had a matching T-  
510 type. **f** 84 out of 100 T-types had a matching A-type.

511

Figure 3

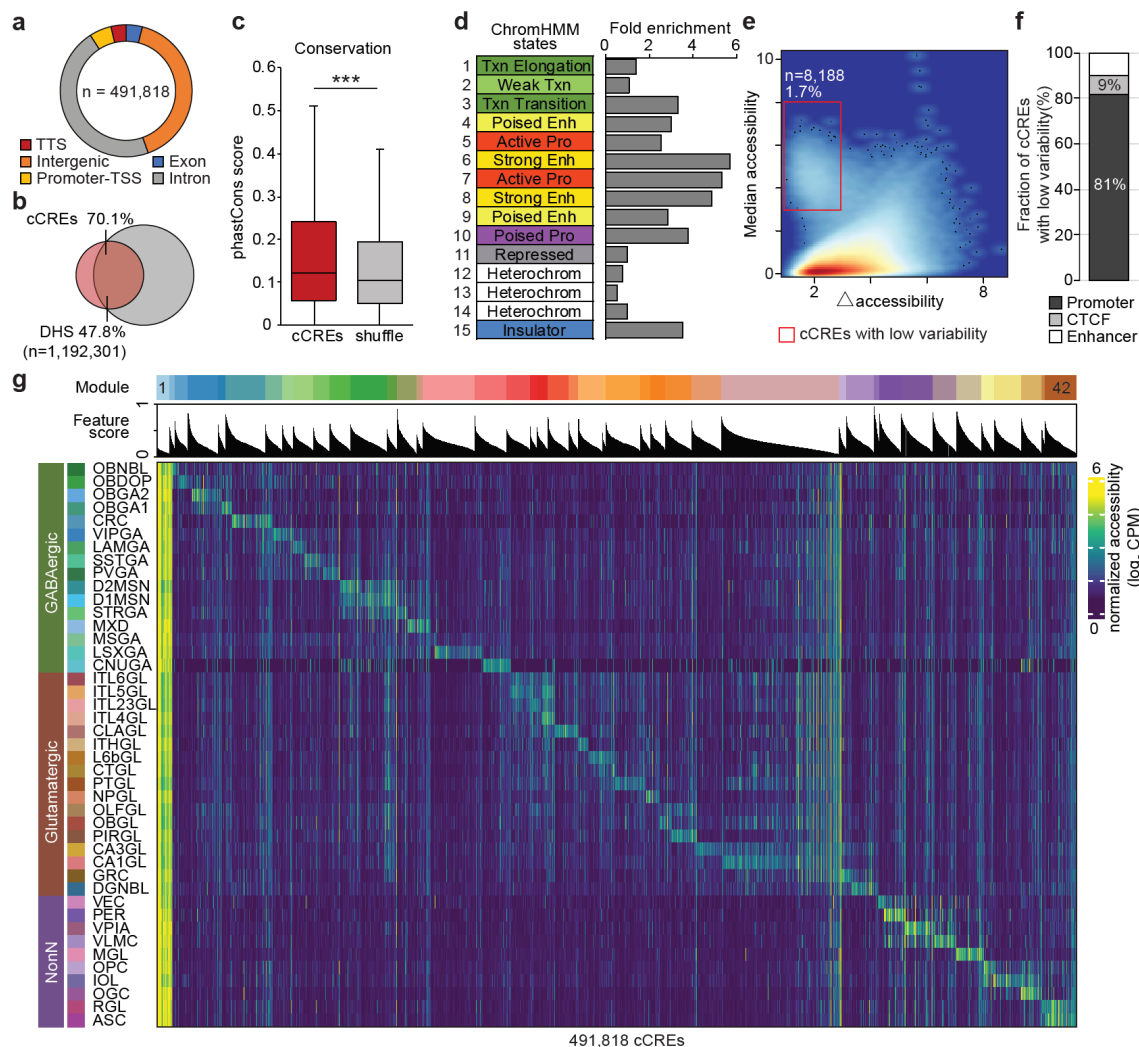

512  
513 **Figure 3: Characterization of candidate *cis* regulatory elements identified in mouse**  
514 **cerebral cell types.**

515 **a** Fraction of the identified cCREs that overlap with annotated transcriptional start sites  
516 (TSS), introns, exons, transcriptional termination sites (TTS) and intergenic regions in the  
517 mouse genome. **b** Venn diagram showing the overlap between cCREs and DNase  
518 hypersensitive sites (DHS) from developmental and adult mouse tissue from the  
519 SCREEN database<sup>42</sup>. **c** Box-Whisker plot showing that sequence conservation measured  
520 by PhastCons score<sup>81</sup> is higher for cCREs than the controls consisting of GC-matched  
521 random genomic sequences (\*\**p* < 0.001, Wilcoxon rank sum test, the box is drawn from  
522 lower quartile (Q1) to upper quartile (Q3) with a horizontal line drawn in the middle to  
523 denote the median, whiskers with maximum 1.5 IQR). **d** Enrichment analysis of cCREs

524 with a 15-state ChromHMM model<sup>45</sup> in the mouse brain chromatin<sup>43</sup>. **e** Density map  
525 showing two main groups of elements based on the median accessibility and the range  
526 of chromatin accessibility variation (maximum – minimum) across cell clusters for each  
527 cCRE. Each dot represents a cCRE. Red box highlights elements with low chromatin  
528 accessibility variability across clusters. **f** 81 % of sites with low variability (red box in **e**)  
529 overlapped promoters, 10 % enhancers and 9 % CTCF regions. **g** Heatmap showing  
530 association of 43 major cell types (rows) with 42 *cis* regulatory modules (top). Each  
531 column represents one of 491,818 cCREs. These cCREs were combined into *cis*  
532 regulatory modules based on accessibility patterns across major cell types. For each  
533 cCRE a feature score was calculated to represent the specificity for a given module.  
534 Module 1 comprised invariable elements and was enriched for promoters. For a full list  
535 and description of cell cluster labels see Supplementary Table 3, for a full list of cluster-  
536 module association see Supplementary Table 7 and for association of cCREs to modules  
537 see Supplementary Table 8. CPM: counts per million.

538

**Figure 4**

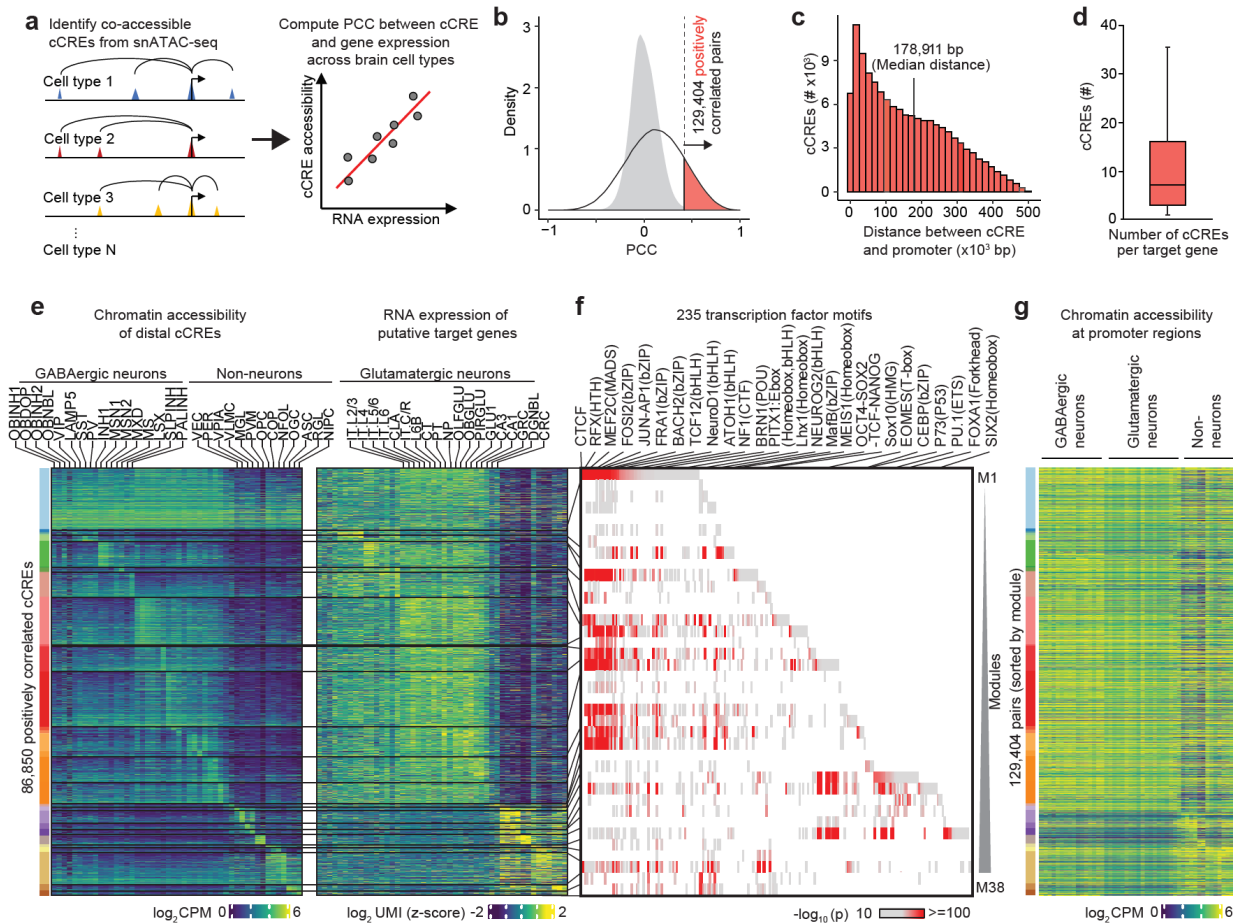

539

540 **Figure 4: Identification and characterization of putative enhancer-gene pairs. a**

541 Schematic overview of the computational strategy to identify cCREs that are positively

542 correlated with transcription of target genes. The cCREs were first assigned to putative

543 target gene promoters in specific cell clusters using co-accessibility analysis with

544 Cicero<sup>49</sup>. Next, chromatin accessibility at cCREs was correlated with RNA-seq signals of

545 the putative target gene across different cell clusters (PCC: Pearson correlation

546 coefficient). **b** Detection of putative enhancer-gene pairs. 129,404 pairs of positively

547 correlated cCRE and genes (highlighted in orange) were identified using an empirically

548 defined significance threshold of FDR<0.01 (see **Methods**). Grey filled curve shows

549 distribution of PCC for randomly shuffled cCRE-gene pairs. **c** Histogram illustrating

550 distance between positively correlated distal cCRE and putative target gene promoters.

551 Median distance was 178,911 bp. **d** Box-Whisker plot showing that genes were linked

552 with a median of 7 putative enhancers (box is drawn from Q1 to Q3 with a horizontal line



553 drawn in the middle to denote the median, whiskers with maximum 1.5 IQR). **e** Heatmap  
554 of chromatin accessibility of 86,850 putative enhancers across cell clusters (left) and  
555 expression of 10,604 linked genes (right). Note genes are displayed for each putative  
556 enhancer separately. For association of modules with cell types see Supplementary Table  
557 11 and association of individual putative enhancer with modules see Supplementary  
558 Table 13. CPM: counts per million, UMI: unique molecular identifier. **f** Enrichment of  
559 known transcription factor motifs in distinct enhancer-gene modules. Displayed are known  
560 motifs from HOMER<sup>46</sup> with enrichment p-value  $<10^{-10}$ . Motifs were sorted based on  
561 module. For full list see Supplementary Table 14. **g** Accessibility at promoter regions  
562 across joint A/T-types, same order as **e**.

563

**Figure 5**

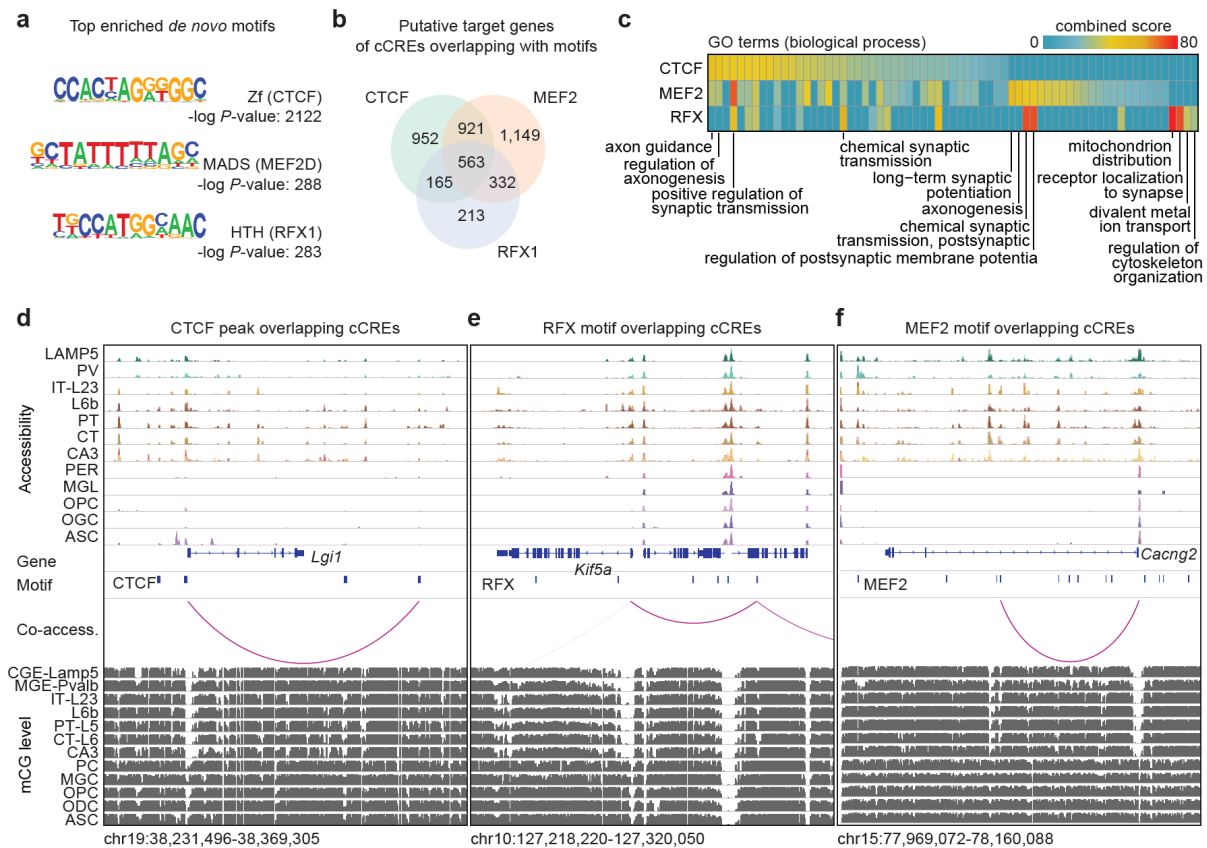

564

565 **Figure 5: Transcription factors involved in a pan neuronal gene regulatory**  
 566 **program.**

567 **a** Enrichment of sequence motifs for CTCF, MEF2 and RFX from *de novo* motif search in  
 568 the putative enhancers of module M1 using HOMER<sup>46</sup>. For a full list see Supplementary  
 569 Table 16. **b** Venn diagram illustrating the overlap of putative target genes of cCREs  
 570 containing binding sites for MEF2, RFX and CTCF, respectively. **c** Gene ontology (GO)  
 571 analysis of the putative target genes of each factor in module M1 was performed using  
 572 Enrichr<sup>82</sup>. The combined score is the product of the computed *p* value using the Fisher  
 573 exact test and the *z*-score of the deviation from the expected rank<sup>82</sup>. **d-f** Examples distal  
 574 cCRE overlapping peaks/motifs and positively correlated putative target genes. For  
 575 CTCF, cCREs were intersected with peak calls from ChIP-seq experiments in the adult  
 576 mouse brain<sup>43</sup> (**d**) and cCREs overlapping RFX (**e**) and MEF2 (**f**) were identified using  
 577 *de novo* motif search in HOMER<sup>46</sup>. Genome browser tracks displaying chromatin  
 578 accessibility, mCG methylation levels (see companion manuscript by Liu, Zhou et al.  
 579 2020<sup>37</sup>) and positively correlated cCRE and genes pairs.

Figure 6

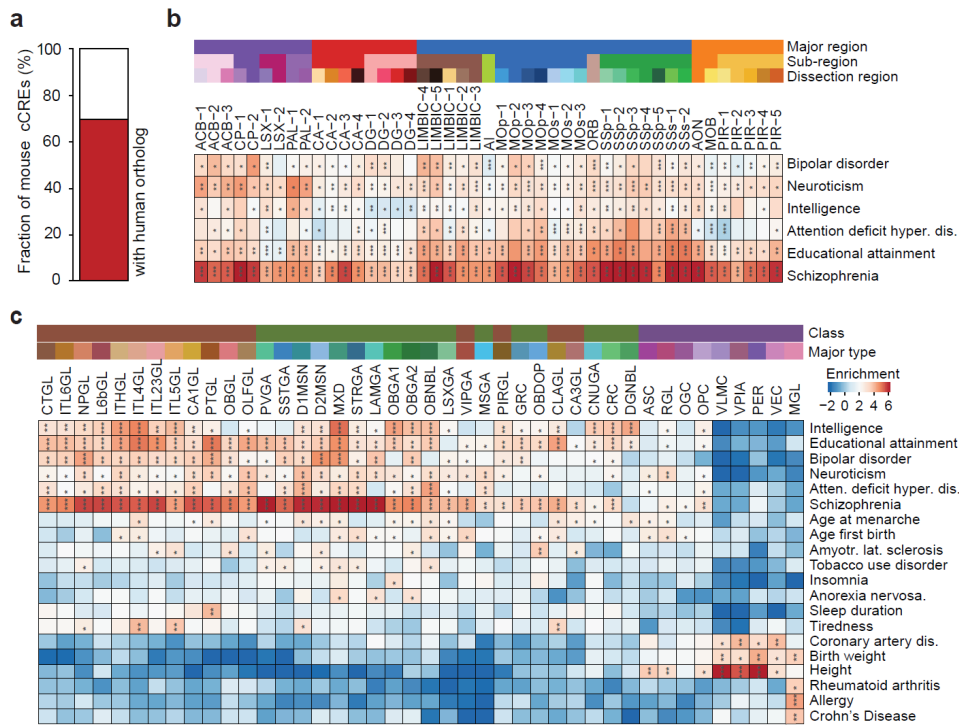

580

581 **Figure 6: Association of different brain regions and cell types with risk variants for**  
582 **neurological diseases and traits.**

583 **a** For 69.2 % of cCREs identified in the current study, we found a human ortholog (> 50  
584 % of bases lifted over to the human genome). **b** Brain-region-specific enrichment of  
585 sequence variants associated with indicated neurological traits and diseases (\* FDR <  
586 0.05, \*\* FDR < 0.01, \*\*\*FDR < 0.001). Displayed are all regions and all tested phenotypes  
587 with at least one significant association. **c** Enrichment of sequence variants associated  
588 with the indicated traits/disease in the human orthologs of cCREs in major mouse cerebral  
589 cell types (\* FDR < 0.05, \*\* FDR < 0.01, \*\*\*FDR < 0.001). Displayed are all major cell  
590 clusters and tested traits/diseases with at least one significant association (FDR < 0.05).  
591 A detailed list of regions can be found in Supplementary Table 1 and a full list of cell  
592 cluster labels can be found in Supplementary Table 3.

## Extended Data Figure 1

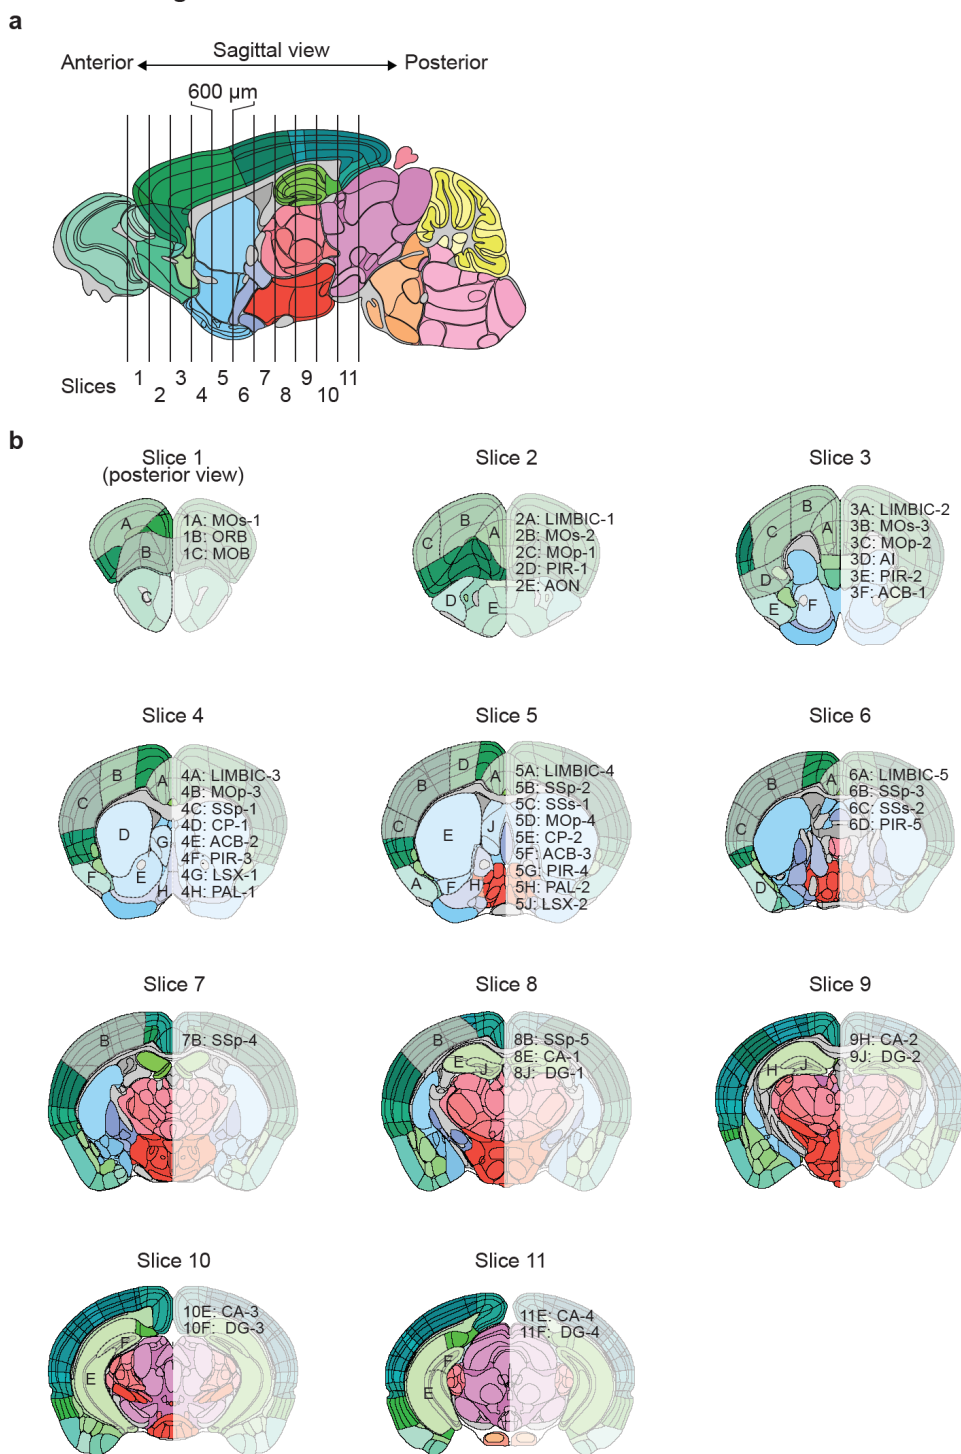

593

594 **Extended Data Figure 1: Maps of mouse brain regions that were dissected in the**

595 **current study.** **a** Schematic of brain sample dissection strategy. Mouse brains were cut

596 into 600  $\mu$ m thick coronal slices; **b** 45 regions were dissected from eleven coronal slices

597 according to the Allen reference atlas. Shown is the frontal view of slice 1-11 and isolated

598 regions. For example, dissection region 1A: MOs-1 denotes part 1 of the secondary motor  
599 cortex (MOs) region which corresponds to region A from slice 1. A detailed list of regions  
600 can be found in Supplementary Table 1.

601

## Extended Data Figure 2

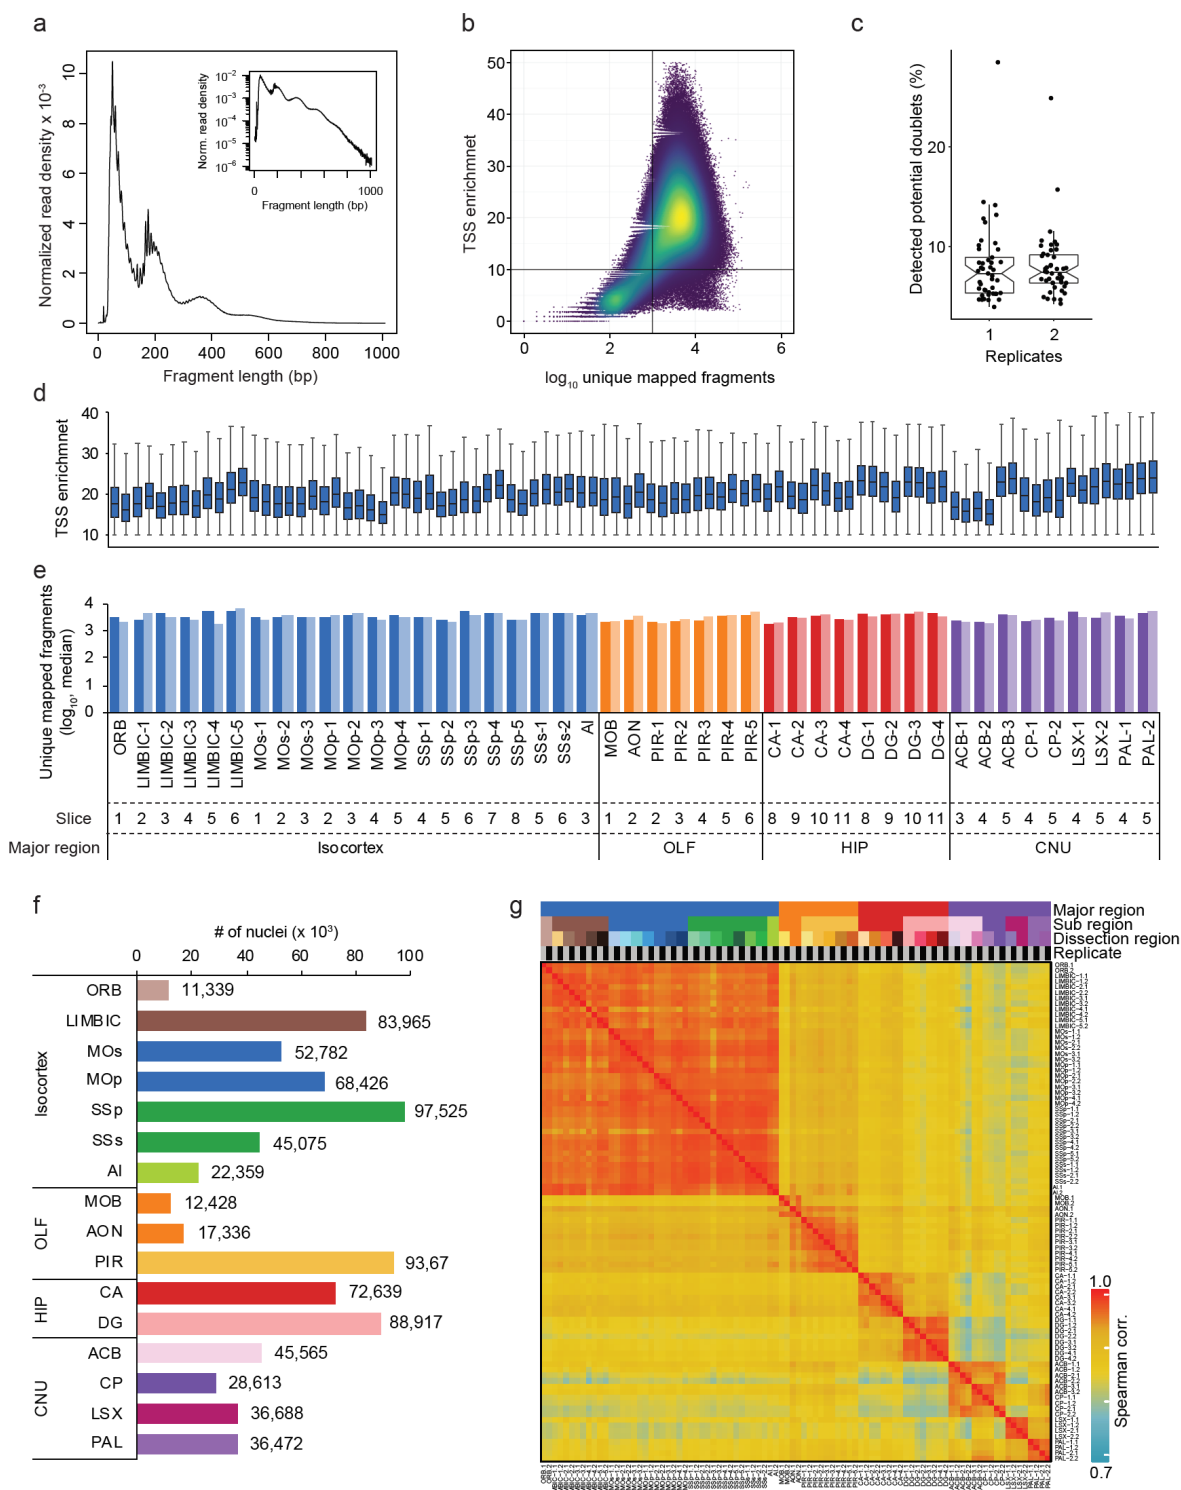

602

603

604

605

**Extended Data Figure 2: Quality metrics of snATAC-seq datasets. a** Fragment size distribution of a typical snATAC-seq library. **b** Dot-plot illustrating fragments per nucleus and individual TSS (transcriptional start site) enrichment. Nuclei in the upper right

606 quadrant were selected for analysis. **c** Fraction of potential barcode collisions detected in  
607 snATAC-seq libraries using a modified version of Scrublet<sup>33</sup> (the box is drawn from lower  
608 quartile (Q1) to upper quartile (Q3) with a horizontal line drawn in the middle to denote  
609 the median, whiskers with maximum 1.5 IQR). Potential barcode collisions were removed  
610 for downstream processing. **d** Distribution of TSS enrichment (the box is drawn from lower  
611 quartile (Q1) to upper quartile (Q3) with a horizontal line drawn in the middle to denote  
612 the median, whiskers with maximum 1.5 IQR) and **e** number of uniquely mapped  
613 fragments/nucleus for individual libraries. **f** Number of nuclei passing quality control for  
614 sub-regions. **g** Spearman correlation matrix of snATAC-seq libraries.

### Extended Data Figure 3

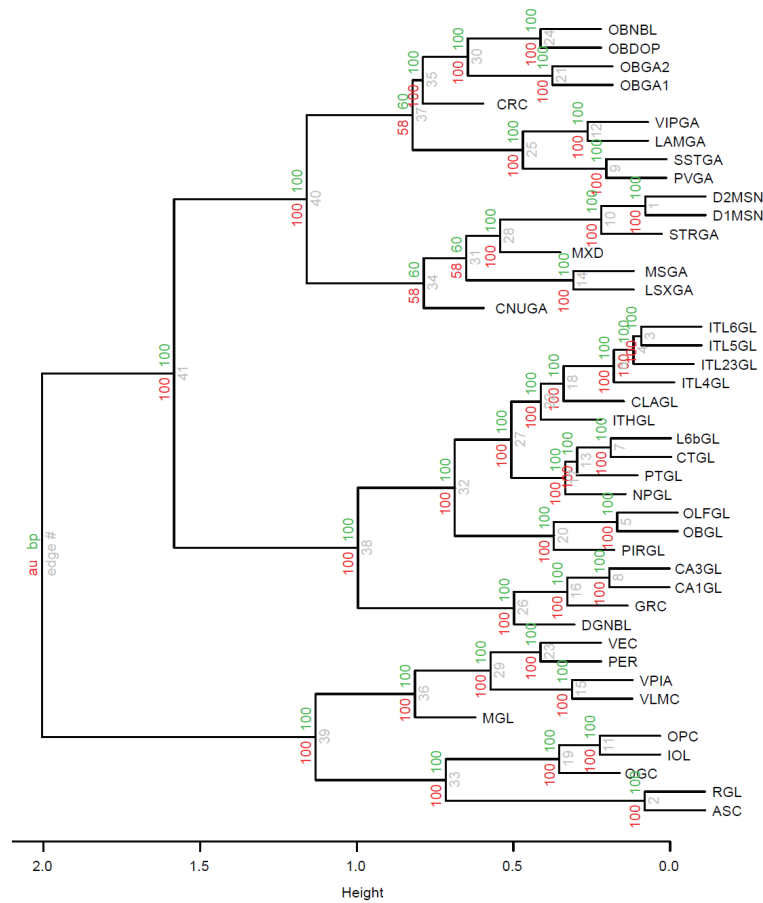

615

616 **Extended Data Figure 3: Hierarchical dendrogram of the major cell types.**

617 Dendrogram for major cell types was constructed using 1000 rounds of bootstrapping for  
618 major cell types using R package pvclust<sup>83</sup>. Nodes are labeled in grey, approximately  
619 unbiased (AU) p-values (in red) and bootstrap probability (BP) values (in green) are  
620 labeled at the shoulder of the nodes, respectively. For a full list and description of cell  
621 cluster labels see Supplementary Table 3.



## Extended Data Figure 4

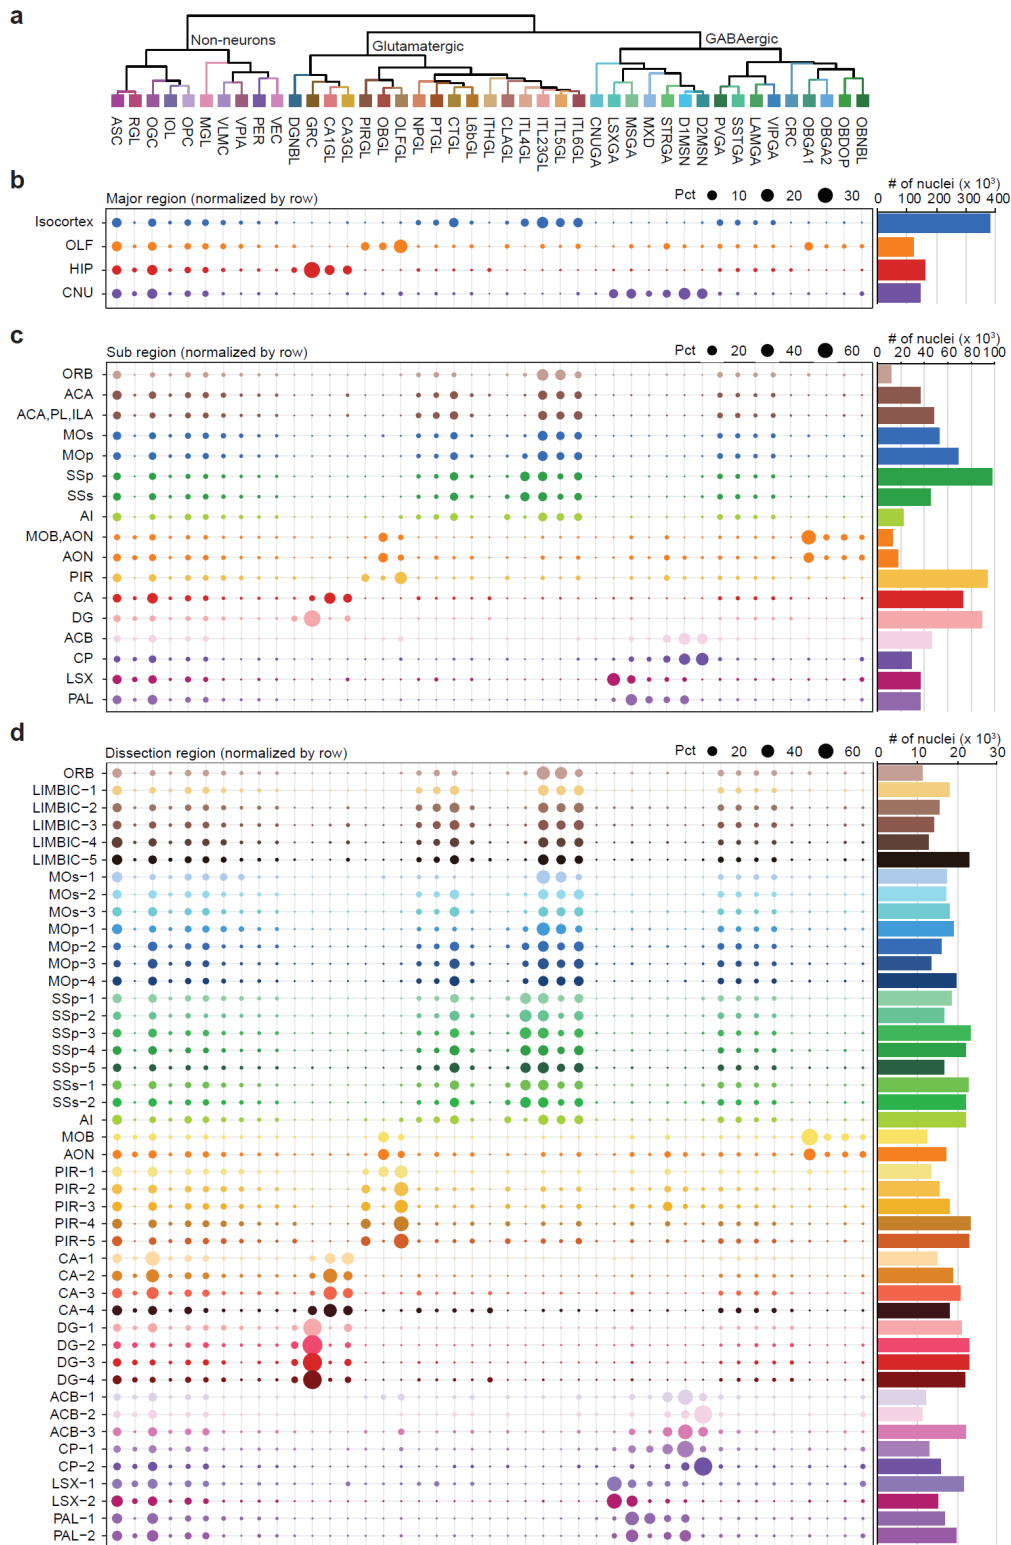

622

623 **Extended Data Figure 4: Relative cell cluster proportion at region resolution. a**

624 Cluster dendrogram based on chromatin accessibility. **b-d** Major cell-type composition in

625 **b** the four major regions, **c** the sub-regions and **d** the dissected regions. Indicated are  
626 row normalized percentages (pct) of clusters per major region and the total number of  
627 nuclei for each major region. Bar plots to the right show total number of nuclei sampled  
628 for each region.

### Extended Data Figure 5

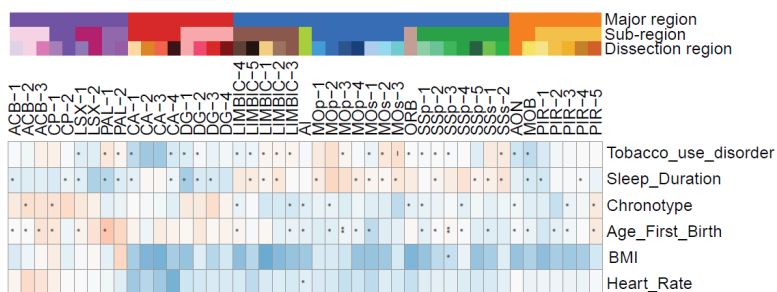

629  
630 **Extended Data Figure 5: GWAS enrichment for additional traits in open chromatin**  
631 **of distinct cell types.**  
632 Brain region specific enrichment of indicated GWAS traits (\* FDR < 0.05, \*\* FDR <0.01,  
633 \*\*\*FDR < 0.001). Displayed are all brain regions and all tested phenotypes with at least  
634 one significant association.

635 **TABLES**

636 **Supplementary Table 1:** Sample and dissection summary

637 **Supplementary Table 2:** Metadata table for nuclei

638 **Supplementary Table 3:** Cell cluster annotation

639 **Supplementary Table 4:** Overlap score for integration of snATAC-seq and scRNA-seq  
640 clusters

641 **Supplementary Table 5:** List of the genomic locations of cCREs

642 **Supplementary Table 6:** Cluster assignment of cCREs

643 **Supplementary Table 7:** Association of *cis* regulatory modules with major cell types

644 **Supplementary Table 8:** Module assignment of cCREs

645 **Supplementary Table 9:** Known motif enrichment in *cis* regulatory modules

646 **Supplementary Table 10:** Summary of gene-cCRE correlations

647 **Supplementary Table 11:** Association of modules with joint cell clusters

648 **Supplementary Table 12:** Association of modules with individual putative enhancers

649 **Supplementary Table 13:** Gene Ontology analysis of candidate target genes of putative  
650 enhancers

651 **Supplementary Table 14:** Known motif enrichment in putative enhancers

652 **Supplementary Table 15:** *De novo* motif enrichment in module M1 putative enhancers

653 **Supplementary Table 16:** Gene Ontology analysis of candidate target gene of putative  
654 enhancers with motif sites in module M1

655 **Supplementary Table 17:** Known motif enrichment in candidate target promoters of  
656 putative enhancers

657 **Supplementary Table 18:** Primer sequences and nuclei barcodes for version 1 and 2  
658 indexing schemes.

## 659 **METHODS**

### 660 **Tissue preparation and nuclei isolation**

661 All experimental procedures using live animals were approved by the SALK Institute  
662 Animal Care and Use Committee under protocol number 18-00006. Adult C57BL/6J male  
663 mice were purchased from Jackson Laboratories. Brains were extracted from 56-63 day  
664 old mice and sectioned into 600  $\mu\text{m}$  coronal sections along the anterior-posterior axis in  
665 ice-cold dissection media.<sup>14,15</sup> Specific brain regions were dissected according to the  
666 Allen Brain Reference Atlas<sup>32</sup> (Extended Data Figure 1) and nuclei isolated as  
667 described.<sup>15</sup>

668

### 669 **Single nucleus ATAC-seq**

670 Single nucleus ATAC-seq was performed as described with steps optimized for  
671 automation<sup>15,31,34</sup>. A step-by-step-protocols for library preparation are available here  
672 (nuclei indexing versions (v1 or v2) used for each library is indicated in Supplementary  
673 Table 1): [https://www.protocols.io/view/sequencing-open-chromatin-of-single-cell-nuclei-  
674 sn-pjudknw/abstract](https://www.protocols.io/view/sequencing-open-chromatin-of-single-cell-nuclei-sn-pjudknw/abstract).

675 Brain nuclei were pelleted with a swinging bucket centrifuge (500 x g, 5 min, 4°C; 5920R,  
676 Eppendorf). Nuclei pellets were resuspended in 1 ml nuclei permeabilization buffer (5 %  
677 BSA, 0.2 % IGEPAL-CA630, 1mM DTT and cOmplete<sup>TM</sup>, EDTA-free protease inhibitor  
678 cocktail (Roche) in PBS) and pelleted again (500 x g, 5 min, 4°C; 5920R, Eppendorf).  
679 Nuclei were resuspended in 500  $\mu\text{L}$  high salt tagmentation buffer (36.3 mM Tris-acetate  
680 (pH = 7.8), 72.6 mM potassium-acetate, 11 mM Mg-acetate, 17.6% DMF) and counted  
681 using a hemocytometer. Concentration was adjusted to 1,000-4,500 nuclei/9  $\mu\text{L}$ , and  
682 1,000-4,500 nuclei were dispensed into each well of a 96-well plate. For tagmentation, 1  
683  $\mu\text{L}$  barcoded Tn5 transposomes<sup>34</sup> were added using a BenchSmart<sup>TM</sup> 96 (Mettler Toledo,  
684 RRID:SCR\_018093, Supplementary Table 18), mixed five times and incubated for 60 min  
685 at 37 °C with shaking (500 rpm). To inhibit the Tn5 reaction, 10  $\mu\text{L}$  of 40 mM EDTA were  
686 added to each well with a BenchSmart<sup>TM</sup> 96 (Mettler Toledo, RRID:SCR\_018093) and  
687 the plate was incubated at 37 °C for 15 min with shaking (500 rpm). Next, 20  $\mu\text{L}$  2 x sort  
688 buffer (2 % BSA, 2 mM EDTA in PBS) were added using a BenchSmart<sup>TM</sup> 96 (Mettler  
689 Toledo, RRID:SCR\_018093). All wells were combined into a FACS tube and stained with

690 3  $\mu$ M Draq7 (Cell Signaling). Using a SH800 (Sony), 20 nuclei were sorted per well into  
691 eight 96-well plates (total of 768 wells) containing 10.5  $\mu$ L EB (25 pmol primer i7, 25 pmol  
692 primer i5, 200 ng BSA (Sigma). Preparation of sort plates and all downstream pipetting  
693 steps were performed on a Biomek i7 Automated Workstation (Beckman Coulter,  
694 RRID:SCR\_018094). After addition of 1  $\mu$ L 0.2% SDS, samples were incubated at 55  $^{\circ}$ C  
695 for 7 min with shaking (500 rpm). 1  $\mu$ L 12.5% Triton-X was added to each well to quench  
696 the SDS. Next, 12.5  $\mu$ L NEBNext High-Fidelity 2 $\times$  PCR Master Mix (NEB) were added  
697 and samples were PCR-amplified (72  $^{\circ}$ C 5 min, 98  $^{\circ}$ C 30 s, (98  $^{\circ}$ C 10 s, 63  $^{\circ}$ C 30 s, 72 $^{\circ}$ C  
698 60 s)  $\times$  12 cycles, held at 12  $^{\circ}$ C). After PCR, all wells were combined. Libraries were  
699 purified according to the MinElute PCR Purification Kit manual (Qiagen) using a vacuum  
700 manifold (QIAvac 24 plus, Qiagen) and size selection was performed with SPRI Beads  
701 (Beckmann Coulter, 0.55x and 1.5x). Libraries were purified one more time with SPRI  
702 Beads (Beckmann Coulter, 1.5x). Libraries were quantified using a Qubit fluorimeter (Life  
703 technologies, RRID:SCR\_018095) and the nucleosomal pattern was verified using a  
704 Tapestation (High Sensitivity D1000, Agilent). Libraries generated with indexing version  
705 1<sup>34</sup> (Supplementary Table 1) were sequenced on a HiSeq2500 sequencer  
706 (RRID:SCR\_016383, Illumina) using custom sequencing primers, 25% spike-in library  
707 and following read lengths: 50 + 43 + 37 + 50 (Read1 + Index1 + Index2 + Read2).  
708 Libraries generated with indexing version 2 (Supplementary Table 1) were sequenced on  
709 a HiSeq4000 (RRID:SCR\_016386, Illumina) using custom sequencing primers with  
710 following read lengths: 50 + 10 + 12 + 50 (Read1 + Index1 + Index2 + Read2). Indexing  
711 primers and sequencing primers are in Supplementary Table 18.

712

### 713 **Nuclei indexing schemes**

714 To generate snATAC-seq libraries we used initially an indexing scheme as described  
715 before (Version 1).<sup>29,31</sup> Here, 16 p5 and 24 p7 indexes were combined to generate an  
716 array of 384 indexes for tagmentation and 16 i5 as well as 48 i7 indexes were combined  
717 for an array of 768 PCR indexes. Due to this library design, it is required to sequence all  
718 four indexes to assign a read to a specific nucleus with long reads and a constant base  
719 sequence for both index reads between i and p barcodes. Therefore, the resulting libraries

720 were sequenced with 25% spike-in library on a HiSeq2500 (RRID:SCR\_016383) and  
721 these read lengths: 50+43+37+50.<sup>31</sup>

722 To generate libraries compatible with other sequencers and not requiring spike-in libraries  
723 or custom sequencing recipes, we modified the library scheme (Version 2). For this, we  
724 used 384 individual indices for T7 and combined with one T5 with a universal index  
725 sequence for tagmentation (for a total of 384 tagmentation indexes). For PCR, we used  
726 768 different i5 indexes and combined with a universal i7 primer index sequence.  
727 Tagmentation indexes were 10 bp and PCR indexes 12 bp long. We made sure, that the  
728 hamming distance between every two barcodes was  $\geq 4$ , the GC content between 37.5-  
729 62.5 % and the number of repeats  $\leq 3$ . The resulting libraries were sequenced on a  
730 HiSeq4000 with custom primers and these read lengths: 50+10+12+50 (Supplementary  
731 Table 18).

732

### 733 **Processing and alignment of sequencing reads**

734 Paired-end sequencing reads were demultiplexed and the cell index transferred to the  
735 read name. Sequencing reads were aligned to mm10 reference genome using bwa<sup>84</sup>.  
736 After alignment, we used the R package ATACseqQC (1.10.2)<sup>85</sup> to check for fragment  
737 length contribution which is characteristic for ATAC-seq libraries. Next, we combined the  
738 sequencing reads to fragments and for each fragment we performed following quality  
739 control: 1) Keep only fragments quality score MAPQ > 30; 2) Keep only the properly  
740 paired fragments with length <1000bp. 3) PCR duplicates were further removed with  
741 SnapTools (<https://github.com/r3fang/SnapTools>, RRID:SCR\_018097)<sup>34</sup>. Reads were  
742 sorted based on the cell barcode in the read name.

743

### 744 **TSS enrichment calculation**

745 Enrichment of ATAC-seq accessibility at TSSs was used to quantify data quality without  
746 the need for a defined peak set. The method for calculating enrichment at TSS was  
747 adapted from previously described. TSS positions were obtained from the GENCODE  
748 database v16 (RRID:SCR\_014966)<sup>40</sup>. Briefly, Tn5 corrected insertions (reads aligned to  
749 the positive strand were shifted +4 bp and reads aligned to the negative strand were  
750 shifted -5 bp) were aggregated  $\pm 2,000$  bp relative (TSS strand-corrected) to each unique

751 TSS genome wide. Then this profile was normalized to the mean accessibility  $\pm 1,900-$   
752 2,000 bp from the TSS and smoothed every 11bp. The max of the smoothed profile was  
753 taken as the TSS enrichment.

754

### 755 **Doublet removal**

756 We used a modified version of Scrublet (RRID:SCR\_018098)<sup>33</sup> to remove potential  
757 doublets for every dataset independently. Peaks were called using MACS2 for aggregate  
758 accessibility profiles on each sample. Next, cell-by-peak count matrices were calculated  
759 and used as input, with default parameters. Doublet scores were calculated for both  
760 observed nuclei  $\{x_i\}$  and simulated doublets  $\{y_i\}$  using Scrublet (RRID:SCR\_018098)<sup>33</sup>.  
761 Next, a threshold  $\theta$  is selected based on the distribution of  $\{y_i\}$ , and observed nuclei with  
762 doublet score larger than  $\theta$  are predicted as doublets. To determine  $\theta$ , we fit a two-  
763 component mixture distribution by using function normalmixEM from R package mixtools.  
764 The lower component contained majority of embedded doublet types, and the other  
765 component contained majority of neo-typic doublets (collision between nuclei from  
766 different clusters. We selected the threshold  $\theta$  where the  $p_1 \cdot pdf(x, \mu_1, \sigma_1) = p_2 \cdot$   
767  $pdf(x, \mu_2, \sigma_2)$ . This value suggested that the nuclei have same chance of belonging to  
768 both classes.

769

### 770 **Clustering and cluster annotation**

771 We used an iterative clustering strategy using the snapATAC package  
772 (RRID:SCR\_018097) with slight modifications as detailed below.<sup>34</sup> For round 1 clustering,  
773 we clustered and finally merged single nuclei to three main cell classes: non-neurons,  
774 GABAergic neurons and glutamatergic neurons. For each main cell class, we performed  
775 another round of clustering to identify major cell types. Last, for each major cell types, we  
776 performed a third round of clustering to find sub-types.

777 Detailed description for every step is listed below:

#### 778 1) Nuclei filtering

779 Nuclei with  $\geq 1,000$  uniquely mapped fragments and TSS (transcription start site)  
780 enrichment  $> 10$  were filtered for individual dataset. Second, potential barcode collisions  
781 were also removed for individual dataset.



782 2) Feature bin selection

783 First, we calculated a cell-by-bin matrix at 500 kb resolution for every dataset  
784 independently and subsequently merged the matrices. Second, we converted the cell-by-  
785 bin count matrix to a binary matrix. Third, we filtered out any bins overlapping with the  
786 ENCODE blacklist (mm10,  
787 [http://mitra.stanford.edu/kundaje/akundaje/release/blacklists/mm10-  
788 mouse/mm10.blacklist.bed.gz](http://mitra.stanford.edu/kundaje/akundaje/release/blacklists/mm10-mouse/mm10.blacklist.bed.gz)). Fourth, we focused on bins on chromosomes 1-19, X and  
789 Y. Last, we removed the top 5% bins with the highest read coverage from the count matrix.

790 3) Dimensionality reduction

791 SnapATAC applies a nonlinear dimensionality reduction method called diffusion maps,  
792 which is highly robust to noise and perturbation.<sup>34</sup> However, the computational time of the  
793 diffusion maps algorithm scales exponentially with the increase of number of cells. To  
794 overcome this limitation, we combined the Nyström method (a sampling technique)<sup>86</sup> and  
795 diffusion maps to present Nyström Landmark diffusion map to generate the low-  
796 dimensional embedding for large-scale dataset.

797 A Nyström landmark diffusion maps algorithm includes three major steps:

- 798 1. sampling: sample a subset of  $K$  ( $K \ll N$ ) cells from  $N$  total cells as “landmarks”.
- 799 2. embedding: compute a diffusion map embedding for  $K$  landmarks;
- 800 3. extension: project the remaining  $N-K$  cells onto the low-dimensional embedding as  
801 learned from the landmarks to create a joint embedding space for all cells.

802 Having more than 800,000 single nuclei at the beginning, we decided to apply this  
803 strategy on the level 1 and 2 clustering. 10,000 cells were sampled as landmarks and the  
804 remaining query cells were projected onto the diffusion maps embedding of landmarks.  
805 Later for the level III clustering, diffusion map embeddings were directly calculated from  
806 all nuclei.

807 4) Principal Component (PC) selection

808 To determine the number of principal components to include for downstream analysis, we  
809 generated “Elbow plot”, to rank all principal components based on the percentage of  
810 variance explained by each one. For each round of clustering, we selected the top 10-20  
811 principal components that captured the majority of the variance.

812 5) Graph-based clustering

813 Using the selected significant components, we next construct a K Nearest Neighbor (KNN)  
814 Graph. Each cell is a node and the k-nearest neighbours of each cell were identified  
815 according to the Euclidian distance and edges were drawn between neighbours in the  
816 graph. Next, we applied the Leiden algorithm on the KNN graph using python package  
817 `leidenalg` (<https://github.com/vtraag/leidenalg>)<sup>87</sup>. We tested different  
818 ‘resolution\_parameter’ parameters (step between 0 and 1 by 0.1) to determine the optimal  
819 resolution for different cell populations. For each resolution value, we tested if there was  
820 clear separation between nuclei. To do so, we generated a cell-by-cell consensus matrix  
821 in which each element represents the fraction of observations two nuclei are part of the  
822 same cluster. A perfectly stable matrix would consist entirely of zeros and ones, meaning  
823 that two nuclei either cluster together or not in every iteration. The relative stability of the  
824 consensus matrices can be used to infer the optimal resolution. To this end, we generated  
825 a consensus matrix based on 300 rounds of Leiden clustering with randomized starting  
826 seed  $s$ . let  $M^s$  denote the  $N \times N$  connectivity matrix resulting from applying Leiden  
827 algorithm to the dataset  $D^s$  with different seeds. The entries of  $M^s$  are defined as follows:

$$828 \quad M^s(i, j) = f(x) = \begin{cases} 1, & \text{if single nucleus } i \text{ and } j \text{ belong to the same cluster} \\ 0, & \text{otherwise} \end{cases}$$

829 Let  $I^s$  be the  $N \times N$  indicator matrix where the  $(i, j)$ -th entry is equal to 1 if nucleus  $i$  and  
830  $j$  are in the same perturbed dataset  $D^s$ , and 0 otherwise. Then, the consensus matrix  $C$  is  
831 defined as the normalised sum of all connectivity matrices of all the perturbed  $D^s$ .

$$832 \quad C(i, j) = \left( \frac{\sum_{s=1}^S M^s(i, j)}{\sum_{s=1}^S I^s(i, j)} \right)$$

833 The entry  $(i, j)$  in the consensus matrix is the number of times single nucleus  $i$  and  $j$  were  
834 clustered together divided by the total number of times they were selected together. The  
835 matrix is symmetric, and each element is defined within the range  $[0,1]$ . We examined  
836 the cumulative distribution function (CDF) curve and calculated proportion of ambiguous  
837 clustering (PAC) score to quantify stability at each resolution. The resolution with a local  
838 minimal of the PAC scores denotes the parameters for the optimal clusters. In the case  
839 these were multiple local minimal PACs, we picked the one with higher resolution.

840 Finally, for every cluster, we tested whether we could identify differential features  
841 compared to all other nuclei (background) and to the nearest nuclei (local background)  
842 using the function 'findDAR'.

## 843 6) Visualization

844 For visualization we applied Uniform Manifold Approximation and Projection (UMAP)<sup>80</sup>.

845

### 846 **Regional specificity**

847 For each cell type, fraction of nuclei is first calculated from each brain regions. Then, we  
848 use function 'entropyDiversity' from R package BioQC (cite) to calculate regional diversity  
849 for each cell types and minus the value by 1 as specificity.

850

### 851 **Identification of reproducible peak sets in each cell cluster**

852 We performed peak calling according to the ENCODE ATAC-seq pipeline  
853 (<https://www.encodeproject.org/atac-seq/>). For every cell cluster, we combined all  
854 properly paired reads to generate a pseudobulk ATAC-seq dataset for individual  
855 biological replicates. In addition, we generated two pseudo-replicates which comprise half  
856 of the reads from each biological replicate. We called peak for each of the four dataset  
857 and a pool of both replicates independently. Peak calling was performed on the Tn5-  
858 corrected single-base insertions using the MACS2<sup>39</sup> with these parameters: --shift -75 --  
859 extsize 150 --nomodel --call-summits --SPMR --keep-dup all -q 0.01. Finally, we extended  
860 peak summits by 250 bp on either side to a final width of 501 bp for merging and  
861 downstream analysis. To generate a list of reproducible peaks, we kept peaks that 1)  
862 were detected in the pooled dataset and overlapped  $\geq 50\%$  of peak length with a peak  
863 in both individual replicates or 2) were detected in the pooled dataset and  
864 overlapped  $\geq 50\%$  of peak length with a peak in both pseudo-replicates.

865 To account for differences in performance of MACS2<sup>39</sup> based on read depth and/or  
866 number of nuclei in individual clusters, we converted MACS2 peak scores ( $-\log_{10}(q$ -  
867 value)) to "score per million"<sup>88</sup>. We filtered reproducible peaks by choosing a "score per  
868 million" cut-off of 2 was used to filter reproducible peaks.

869 We only kept reproducible peaks on chromosome 1-19 and both sex chromosomes, and  
870 filtered ENCODE mm10 blacklist regions (mm10,

871 <http://mitra.stanford.edu/kundaje/akundaje/release/blacklists/mm10->  
872 [mouse/mm10.blacklist.bed.gz](http://mitra.stanford.edu/kundaje/akundaje/release/blacklists/mm10-mouse/mm10.blacklist.bed.gz)). A union peak list for the whole dataset obtained by  
873 merging peak sets from all cell clusters using BEDtools (RRID:SCR\_006646)<sup>89</sup>.

874 Lastly, since snATAC-seq data are very sparse, we selected only elements that were  
875 identified as open chromatin in a significant fraction of the cells in each cluster. To this  
876 end, we first randomly selected same number of non-DHS regions (~ 670k elements)  
877 from the genome as background and calculated the fraction of nuclei for each cell type  
878 that that showed a signal at these sites. Next, we fitted a zero-inflated beta model and  
879 empirically identified a significance threshold of FDR < 0.01 to filter potential false positive  
880 peaks. Peak regions with FDR < 0.01 in at least one of the clusters were included into  
881 downstream analysis.

882

### 883 **Computing chromatin accessibility scores**

884 Accessibility of cCREs in individual clusters was quantified by counting the fragments in  
885 individual clusters normalized by read depth (counts per million: CPM).

886 For each gene, we summed counts within the gene body + 2kb upstream to calculate  
887 “gene activity score (GAS)” using Seurat  
888 ([https://satijalab.org/seurat/v3.1/atacseq\\_integration\\_vignette.html](https://satijalab.org/seurat/v3.1/atacseq_integration_vignette.html),  
889 RRID:SCR\_016341)<sup>38</sup>, GAS were used for visualization and integrative analysis with  
890 single cell RNA-seq.

891

### 892 **Integrative analysis of single nucleus ATAC-seq and single cell RNA-seq for mouse** 893 **brain**

894 For integrative analysis, we downloaded level 5 clustering data from the Mouse Brain  
895 Atlas website (<http://mousebrain.org>)<sup>1</sup>. First, we filtered brain regions that matched  
896 samples profiled in this study using these attributes for “Region”: "CNS", "Cortex",  
897 "Hippocampus", "Hippocampus,Cortex", "Olfactory bulb", "Striatum dorsal", "Striatum  
898 ventral", "Dentate gyrus", "Striatum dorsal,Striatum ventral", "Striatum dorsal, Striatum  
899 ventral, Dentate gyrus", "Pallidum", "Striatum dorsal, Striatum ventral, Amygdala",  
900 "Striatum dorsal, Striatum ventral", "Telencephalon", "Brain", "Sub ventricular zone,  
901 Dentate gyrus"

902 Second, we manually subset cell types into three groups by checking the attribute in  
903 "Taxonomy\_group": Non-neurons: "Vascular and leptomeningeal cells", "Astrocytes",  
904 "Oligodendrocytes", "Ependymal cells", "Microglia", "Oligodendrocyte precursor cells",  
905 "Olfactory ensheathing cells", "Pericytes", "Vascular smooth muscle cells", "Perivascular  
906 macrophages", "Dentate gyrus radial glia-like cells", "Subventricular zone radial glia-like  
907 cells", "Vascular smooth muscle cells", "Vascular endothelial cells", "Vascular and  
908 leptomeningeal cells"; GABAergic neurons: "Non-glutamatergic neuroblasts",  
909 "Telencephalon projecting inhibitory neurons", "Olfactory inhibitory neurons",  
910 "Glutamatergic neuroblasts", "Cholinergic and monoaminergic neurons", "Di- and  
911 mesencephalon inhibitory neurons", "Telencephalon inhibitory interneurons",  
912 "Peptidergic neurons"; Glutamatergic neurons: "Dentate gyrus granule neurons", "Di- and  
913 mesencephalon excitatory neurons", "Telencephalon projecting excitatory neurons"  
914 We performed integrative analysis with single cell RNA-seq using Seurat 3.0  
915 (RRID:SCR\_016341) to compare cell annotation between different modalities<sup>38</sup>. We  
916 randomly selected 200 nuclei (and used all nuclei for cell cluster with <200 nuclei) from  
917 each cell cluster for integrative analysis. We first generated a Seurat object in R by using  
918 previously calculated gene activity scores, diffusion map embeddings and cell cluster  
919 labels from snATAC-seq. Then, variable genes were identified from scRNA-seq and used  
920 for identifying anchors between these two modalities. Finally, to visualize all the cells  
921 together, we co-embedded the scRNA-seq and snATAC-seq profiles in the same low  
922 dimensional space.

923 To quantify the similarity between cell clusters from two modalities, we calculated an  
924 overlapping score as the sum of the minimum proportion of cells/nuclei in each cluster  
925 that overlapped within each co-embedding cluster<sup>10</sup>. Cluster overlaps varied from 0 to 1  
926 and were visualized as a heat map with snATAC-seq clusters in rows and scRNA-seq  
927 clusters in columns.

928

### 929 **Identification of *cis* regulatory modules**

930 We used Nonnegative Matrix Factorization (NMF)<sup>90</sup> to group cCREs into *cis* regulatory  
931 modules based on their relative accessibility across major clusters. We adapted NMF  
932 (Python package: sklearn<sup>91</sup>) to decompose the cell-by-cCRE matrix  $V$  ( $N \times M$ ,  $N$  rows:

933 cCRE, M columns: cell clusters) into a coefficient matrix  $H$  ( $R \times M$ , R rows: number of  
934 modules) and a basis matrix  $W$  ( $N \times R$ ), with a given rank  $R$ :

$$935 \quad V \approx WH,$$

936 The basis matrix defines module related accessible cCREs, and the coefficient matrix  
937 defines the cell cluster components and their weights in each module. The key issue to  
938 decompose the occupancy profile matrix was to find a reasonable value for the rank  $R$   
939 (i.e., the number of modules). Several criteria have been proposed to decide whether a  
940 given rank  $R$  decomposes the occupancy profile matrix into meaningful clusters. Here we  
941 applied two measurements “Sparseness”<sup>92</sup> and “Entropy”<sup>93</sup> to evaluate the clustering  
942 result. Average values were calculated from 100 times for NMF runs at each given rank  
943 with random seed, which will ensure the measurements are stable.

944 Next, we used the coefficient matrix to associate modules with distinct cell clusters. In the  
945 coefficient matrix, each row represents a module and each column represents a cell  
946 cluster. The values in the matrix indicate the weights of clusters in their corresponding  
947 module. The coefficient matrix was then scaled by column (cluster) from 0 to 1.  
948 Subsequently, we used a coefficient  $> 0.1$  (~95th percentile of the whole matrix) as  
949 threshold to associate a cluster with a module.

950 In addition, we associated each module with accessible elements using the basis matrix.  
951 For each element and each module, we derived a basis coefficient score, which  
952 represents the accessible signal contributed by all cluster in the defined module. In  
953 addition, we also implemented and calculated a basis-specificity score called “feature  
954 score” for each accessible element using the “kim” method<sup>93</sup>. The feature score ranges  
955 from 0 to 1. A high feature score means that a distinct element is specifically associated  
956 with a specific module. Only features that fulfil both following criteria were retained as  
957 module specific elements:

- 958 1. feature score greater than median + 3 standard deviation;
- 959 2. the maximum contribution to a basis component is greater than the median of all  
960 contributions (i.e. of all elements of  $W$ ).

961

## 962 **Dendrogram construction for mouse brain cell types**

963 First, we calculated for cCRE the median accessibility per cluster and used this value as  
964 cluster centroid. Next, we calculated the coefficient of variant (CV) for the cluster centroid  
965 of each element across major cell types. Finally, we only kept variable elements with CV  
966 larger than 1.5 for dendrogram construction.

967 We used the set of variable features defined above to calculate a correlation-based  
968 distance matrix. Next, we performed linkage hierarchical clustering using the R package  
969 pvclust (v.2.0)<sup>83</sup> with parameters `method.dist="cor"` and `method.hclust="ward.D2"`. The  
970 confidence for each branch of the tree was estimated by the bootstrap resampling  
971 approach.

972

### 973 **Motif enrichment**

974 We performed both *de novo* and known motif enrichment analysis using Homer (v4.11,  
975 RRID:SCR\_010881)<sup>46</sup>. For cCREs in the consensus list, we scanned a region of  $\pm 250$   
976 bp around the center of the element. And for proximal/promoter regions, we scanned a  
977 region of  $\pm 1000$  bp around the transcriptional start site.

978

### 979 **GREAT analysis**

980 Gene ontology annotation of cCREs was performed using GREAT (version 4.0.4,  
981 RRID:SCR\_005807)<sup>94</sup> with default parameters. GO Biological Process was used for  
982 annotations.

983

### 984 **Gene ontology enrichment**

985 We perform gene ontology enrichment analysis using R package Enrichr  
986 (RRID:SCR\_001575)<sup>82</sup>. Gene set library "GO\_Biological\_Process\_2018" was used with  
987 default parameters. The combined score is defined as the p-value computed using the  
988 Fisher exact test multiplied with the z-score of the deviation from the expected rank.

989

### 990 **Predicting enhancer-promoter interactions**

991 First, co-accessible regions are identified for all open regions in each cell cluster  
992 (randomly selected 200 nuclei, and used all nuclei for cell cluster with <200 nuclei)  
993 separately, using Cicero<sup>49</sup> with following parameters: aggregation  $k = 10$ , window size =

994 500 kb, distance constraint = 250 kb. In order to find an optimal co-accessibility threshold  
995 for each cluster, we generated a random shuffled cCRE-by-cell matrix as background and  
996 identified co-accessible regions from this shuffled matrix. We fitted the distribution of co-  
997 accessibility scores from random shuffled background into a normal distribution model by  
998 using R package `fitdistrplus`<sup>95</sup>. Next, we tested every co-accessibility pairs and set the  
999 cut-off at co-accessibility score with empirically defined significance threshold of  
1000  $FDR < 0.01$ .

1001 CCRE outside of  $\pm 1$  kb of transcriptional start sites (TSS) in GENCODE mm10 (v16,  
1002 RRID:SCR\_014966).<sup>40</sup> were considered distal. Next, we assigned co-accessibility pairs  
1003 to three groups: proximal-to-proximal, distal-to-distal, and distal-to-proximal. In this study,  
1004 we focus only on distal-to-proximal pairs. We further used RNA expression from matched  
1005 T-types to filter pairs that were linked to non-expressed genes (normalized UMI > 5).  
1006 We calculated Pearson's correlation coefficient (PCC) between gene expression and  
1007 cCRE accessibility across joint RNA-ATAC clusters to examine the relationship between  
1008 co-accessibility pairs. To do so, we first aggregated all nuclei/cells from scRNA-seq and  
1009 snATAC-seq for every joint cluster to calculate accessibility scores ( $\log_2$  CPM) and  
1010 relative expression levels ( $\log_2$  normalized UMI). Then, PCC was calculated for every  
1011 gene-cCRE pair within a 1 Mbp window centered on the TSS for every gene. We also  
1012 generated a set of background pairs by randomly selecting regions from different  
1013 chromosomes and shuffling of cluster labels. Finally, we fit a normal distribution model  
1014 and defined a cut-off at PCC score with empirically defined significance threshold of  
1015  $FDR < 0.01$ , in order to select significant positively correlated cCRE-gene pairs.

1016

### 1017 **GWAS enrichment**

1018 To enable comparison to GWAS of human phenotypes, we used `liftOver` with settings “-  
1019 `minMatch=0.5`” to convert accessible elements from mm10 to hg19 genomic  
1020 coordinates.<sup>69</sup> Next, we reciprocal lifted the elements back to mm10 and only kept the  
1021 regions that mapped to original loci. We further removed converted regions with length >  
1022 1kb.

1023 We obtained GWAS summary statistics for quantitative traits related to neurological  
1024 disease and control traits: Heart Failure<sup>96</sup>, Type 1 Diabetes<sup>97</sup>, Age First Birth and Number



1025 Children Born<sup>98</sup>, Lupus<sup>99</sup>, Primary Biliary Cirrhosis<sup>100</sup>, Tiredness<sup>101</sup>, Crohns\_Disease<sup>102</sup>,  
1026 Inflammatory Bowel Disease<sup>102</sup>, Ulcerative\_Colitis<sup>102</sup>, Asthma<sup>103</sup>, Attention Deficit  
1027 Hyperactivity Disorder<sup>104</sup>, Heart Rate<sup>105</sup>, Celiacs Disease<sup>106</sup>, HOMA-B<sup>107</sup>, HOMA-IR<sup>107</sup>,  
1028 Childhood Aggression<sup>108</sup>, Atopic Dermatitis<sup>109</sup>, Allergy<sup>110</sup>, HDL\_Cholesterol<sup>111</sup>,  
1029 LDL\_Cholesterol<sup>111</sup>, Total Cholesterol<sup>111</sup>, Triglycerides<sup>111</sup>, Autism Spectrum Disorder<sup>112</sup>,  
1030 Birth Weight<sup>113</sup>, Bipolar Disorder<sup>114</sup>, Multiple Sclerosis<sup>115</sup>, Insomnia<sup>116</sup>, Vitamin D<sup>117</sup>,  
1031 Primary Sclerosing Cholangitis<sup>118</sup>, Vitiligo<sup>119</sup>, Chronotype<sup>120</sup>, Sleep Duration<sup>120</sup>,  
1032 Alzheimer's Disease<sup>121</sup>, BMI<sup>122</sup>, Neuroticism<sup>123</sup>, Type 2 Diabetes<sup>124</sup>, Stroke<sup>125</sup>, Fasting  
1033 Glucose<sup>126</sup>, Fasting Insulin<sup>126</sup>, Child Sleep Duration<sup>127</sup>, Coronary Artery Disease<sup>128</sup>, Atrial  
1034 Fibrillation<sup>129</sup>, Rheumatoid Arthritis<sup>130</sup>, Educational Attainment<sup>131</sup>, Chronic Kidney  
1035 Disease<sup>132</sup>, Obsessive Compulsive Disorder<sup>133</sup>, Post Traumatic Stress Disorder<sup>134</sup>,  
1036 Schizophrenia<sup>135</sup>, Age At Menopause<sup>136</sup>, Age At Menarche<sup>137</sup>, Tobacco use disorder  
1037 ([ftp://share.sph.umich.edu/UKBB\\_SAIGE\\_HRC/](ftp://share.sph.umich.edu/UKBB_SAIGE_HRC/), Phenotype code: 318)<sup>138</sup>,  
1038 Intelligence<sup>139</sup>, Alcohol Usage<sup>140</sup>, Fasting Proinsulin<sup>141</sup>, Head Circumference<sup>142</sup>,  
1039 Microalbuminuria<sup>143</sup>, Extraversion<sup>144</sup>, Birth Length<sup>145</sup>, Amyotrophic Lateral Sclerosis<sup>146</sup>,  
1040 Anorexia Nervosa<sup>147</sup>, HbA1c<sup>148</sup>, Major Depressive Disorder<sup>149</sup>, Height<sup>150</sup>.

1041 We prepared summary statistics to the standard format for Linkage disequilibrium (LD)  
1042 score regression. We used homologous sequences for each major cell types as a binary  
1043 annotation, and the superset of all candidate regulatory peaks as the background control.  
1044 For each trait, we used cell type specific (CTS) LD score regression  
1045 (<https://github.com/bulik/ldsc>) to estimate the enrichment coefficient of each annotation  
1046 jointly with the background control<sup>70</sup>.

1047

## 1048 **External datasets**

1049 We listed all the datasets we used in this study for intersection analysis:

1050 rDHS regions for both hg19 and mm10 are obtained from SCREEN database  
1051 (<https://screen.encodeproject.org>)<sup>41,42</sup>.

1052 ChromHMM<sup>43,45</sup> states for mouse brain are download from GitHub  
1053 ([https://github.com/gireeshkbogu/chromatin\\_states\\_chromHMM\\_mm9](https://github.com/gireeshkbogu/chromatin_states_chromHMM_mm9)), and coordinates  
1054 are LiftOver (<https://genome.ucsc.edu/cgi-bin/hgLiftOver>) to mm10 with default  
1055 parameters<sup>69</sup>.

1056 PhastCons<sup>81</sup> conserved elements were download from the UCSC Genome Browser  
1057 (<http://hgdownload.cse.ucsc.edu/goldenpath/mm10/phastCons60way/>).

1058 CTCF binding sites are download from Mouse Encode Project<sup>43</sup>  
1059 (<http://chromosome.sdsc.edu/mouse/>). CTCF binding sites from cortex and olfactory bulb  
1060 were used in this study. Peaks are extended  $\pm$  500 bp from the loci of peak summits and  
1061 used LiftOver to mm10<sup>69</sup>.

1062

### 1063 **Statistics**

1064 No statistical methods were used to predetermine sample sizes. There was no  
1065 randomization of the samples, and investigators were not blinded to the specimens being  
1066 investigated. However, clustering of single nuclei based on chromatin accessibility was  
1067 performed in an unbiased manner, and cell types were assigned after clustering. Low-  
1068 quality nuclei and potential barcode collisions were excluded from downstream analysis  
1069 as outlined above. For significance of ontology enrichments using GREAT, Bonferroni-  
1070 corrected binomial p values were used<sup>94</sup>. For ontology enrichment using Enrichr the  
1071 combined score which represents the product of the p-value computed using the Fisher  
1072 exact test multiplied with the z-score of the deviation from the expected rank was used<sup>82</sup>.  
1073 For significance testing of enrichment of *de novo* motifs, a hypergeometric test was used  
1074 without correction for multiple testing<sup>46</sup>.

1075

### 1076 **Data availability**

1077 Demultiplexed data can be accessed via the NEMO archive (NEMO, RRID:SCR\_016152)  
1078 here: <http://data.nemoarchive.org/biccn/grant/cemba/ecker/chromatin/scell/raw/>

1079 Processed data are available on our web portal and can be explored here:

1080 <http://catlas.org/mousebrain>

1081

### 1082 **Code availability**

1083 Custom code and scripts used for analysis can be accessed here:

1084 <https://github.com/YoungLeeBBS/snATACutils> and <https://github.com/r3fang/SnapATAC>.

1085 **REFERENCES**

- 1086 1 Zeisel, A. *et al.* Molecular Architecture of the Mouse Nervous System. *Cell* **174**,  
1087 999-1014 e1022, doi:10.1016/j.cell.2018.06.021 (2018).
- 1088 2 Saunders, A. *et al.* Molecular Diversity and Specializations among the Cells of the  
1089 Adult Mouse Brain. *Cell* **174**, 1015-1030 e1016, doi:10.1016/j.cell.2018.07.028  
1090 (2018).
- 1091 3 Tasic, B. *et al.* Shared and distinct transcriptomic cell types across neocortical  
1092 areas. *Nature* **563**, 72-78, doi:10.1038/s41586-018-0654-5 (2018).
- 1093 4 Moffitt, J. R. *et al.* Molecular, spatial, and functional single-cell profiling of the  
1094 hypothalamic preoptic region. *Science* **362**, doi:10.1126/science.aau5324 (2018).
- 1095 5 Eng, C. L. *et al.* Transcriptome-scale super-resolved imaging in tissues by RNA  
1096 seqFISH. *Nature* **568**, 235-239, doi:10.1038/s41586-019-1049-y (2019).
- 1097 6 *The Rat Nervous System*, . 4th edition edn, (2015).
- 1098 7 Harris, K. D. & Shepherd, G. M. The neocortical circuit: themes and variations. *Nat*  
1099 *Neurosci* **18**, 170-181, doi:10.1038/nn.3917 (2015).
- 1100 8 Huang, Z. J. Toward a genetic dissection of cortical circuits in the mouse. *Neuron*  
1101 **83**, 1284-1302, doi:10.1016/j.neuron.2014.08.041 (2014).
- 1102 9 Douglas, R. J. & Martin, K. A. Neuronal circuits of the neocortex. *Annu Rev*  
1103 *Neurosci* **27**, 419-451, doi:10.1146/annurev.neuro.27.070203.144152 (2004).
- 1104 10 Hodge, R. D. *et al.* Conserved cell types with divergent features in human versus  
1105 mouse cortex. *Nature* **573**, 61-68, doi:10.1038/s41586-019-1506-7 (2019).
- 1106 11 Luo, C. *et al.* Single nucleus multi-omics links human cortical cell regulatory  
1107 genome diversity to disease risk variants. *bioRxiv* (2019).
- 1108 12 Ecker, J. R. *et al.* The BRAIN Initiative Cell Census Consortium: Lessons Learned  
1109 toward Generating a Comprehensive Brain Cell Atlas. *Neuron* **96**, 542-557,  
1110 doi:10.1016/j.neuron.2017.10.007 (2017).
- 1111 13 Lee, D. S. *et al.* Simultaneous profiling of 3D genome structure and DNA  
1112 methylation in single human cells. *Nat Methods* **16**, 999-1006,  
1113 doi:10.1038/s41592-019-0547-z (2019).
- 1114 14 Luo, C. *et al.* Single-cell methylomes identify neuronal subtypes and regulatory  
1115 elements in mammalian cortex. *Science* **357**, 600-604,  
1116 doi:10.1126/science.aan3351 (2017).
- 1117 15 Yao, Z. *et al.* An integrated transcriptomic and epigenomic atlas of mouse primary  
1118 motor cortex cell types. *bioRxiv* (2020).
- 1119 16 Kepecs, A. & Fishell, G. Interneuron cell types are fit to function. *Nature* **505**, 318-  
1120 326, doi:10.1038/nature12983 (2014).
- 1121 17 Hrvatin, S. *et al.* Single-cell analysis of experience-dependent transcriptomic  
1122 states in the mouse visual cortex. *Nat Neurosci* **21**, 120-129, doi:10.1038/s41593-  
1123 017-0029-5 (2018).
- 1124 18 Yap, E. L. & Greenberg, M. E. Activity-Regulated Transcription: Bridging the Gap  
1125 between Neural Activity and Behavior. *Neuron* **100**, 330-348,  
1126 doi:10.1016/j.neuron.2018.10.013 (2018).
- 1127 19 Shlyueva, D., Stampfel, G. & Stark, A. Transcriptional enhancers: from properties  
1128 to genome-wide predictions. *Nat Rev Genet* **15**, 272-286, doi:10.1038/nrg3682  
1129 (2014).

- 1130 20 Buenrostro, J. D., Giresi, P. G., Zaba, L. C., Chang, H. Y. & Greenleaf, W. J.  
1131 Transposition of native chromatin for fast and sensitive epigenomic profiling of  
1132 open chromatin, DNA-binding proteins and nucleosome position. *Nat Methods* **10**,  
1133 1213-1218, doi:10.1038/nmeth.2688 (2013).
- 1134 21 Rivera, C. M. & Ren, B. Mapping human epigenomes. *Cell* **155**, 39-55,  
1135 doi:10.1016/j.cell.2013.09.011 (2013).
- 1136 22 Cusanovich, D. A. *et al.* Multiplex single cell profiling of chromatin accessibility by  
1137 combinatorial cellular indexing. *Science* **348**, 910-914,  
1138 doi:10.1126/science.aab1601 (2015).
- 1139 23 Buenrostro, J. D. *et al.* Single-cell chromatin accessibility reveals principles of  
1140 regulatory variation. *Nature* **523**, 486-490, doi:10.1038/nature14590 (2015).
- 1141 24 Lareau, C. A. *et al.* Droplet-based combinatorial indexing for massive-scale single-  
1142 cell chromatin accessibility. *Nat Biotechnol* **37**, 916-924, doi:10.1038/s41587-019-  
1143 0147-6 (2019).
- 1144 25 Mezger, A. *et al.* High-throughput chromatin accessibility profiling at single-cell  
1145 resolution. *Nat Commun* **9**, 3647, doi:10.1038/s41467-018-05887-x (2018).
- 1146 26 Chen, X., Miragaia, R. J., Natarajan, K. N. & Teichmann, S. A. A rapid and robust  
1147 method for single cell chromatin accessibility profiling. *Nat Commun* **9**, 5345,  
1148 doi:10.1038/s41467-018-07771-0 (2018).
- 1149 27 Lake, B. B. *et al.* Integrative single-cell analysis of transcriptional and epigenetic  
1150 states in the human adult brain. *Nat Biotechnol* **36**, 70-80, doi:10.1038/nbt.4038  
1151 (2018).
- 1152 28 Graybuck, L. T. *et al.* Prospective, brain-wide labeling of neuronal subclasses with  
1153 enhancer-driven AAVs. *bioRxiv* (2019).
- 1154 29 Cusanovich, D. A. *et al.* A Single-Cell Atlas of In Vivo Mammalian Chromatin  
1155 Accessibility. *Cell* **174**, 1309-1324 e1318, doi:10.1016/j.cell.2018.06.052 (2018).
- 1156 30 Sinnamon, J. R. *et al.* The accessible chromatin landscape of the murine  
1157 hippocampus at single-cell resolution. *Genome Res* **29**, 857-869,  
1158 doi:10.1101/gr.243725.118 (2019).
- 1159 31 Preissl, S. *et al.* Single-nucleus analysis of accessible chromatin in developing  
1160 mouse forebrain reveals cell-type-specific transcriptional regulation. *Nat Neurosci*  
1161 **21**, 432-439, doi:10.1038/s41593-018-0079-3 (2018).
- 1162 32 Science, A. I. f. B. Allen Mouse Brain Reference Atlas CCF v3. *Allen Mouse Brain*  
1163 *Reference Atlas CCF v3* (2017).
- 1164 33 Wolock, S. L., Lopez, R. & Klein, A. M. Scrublet: Computational Identification of  
1165 Cell Doublets in Single-Cell Transcriptomic Data. *Cell Syst* **8**, 281-291 e289,  
1166 doi:10.1016/j.cels.2018.11.005 (2019).
- 1167 34 Fang, R. *et al.* Fast and Accurate Clustering of Single Cell Epigenomes Reveals  
1168 *Cis*-Regulatory Elements in Rare Cell Types. *bioRxiv* (2019).
- 1169 35 Tasic, B. *et al.* Adult mouse cortical cell taxonomy revealed by single cell  
1170 transcriptomics. *Nat Neurosci* **19**, 335-346, doi:10.1038/nn.4216 (2016).
- 1171 36 Hochgerner, H., Zeisel, A., Lonnerberg, P. & Linnarsson, S. Conserved properties  
1172 of dentate gyrus neurogenesis across postnatal development revealed by single-  
1173 cell RNA sequencing. *Nat Neurosci* **21**, 290-299, doi:10.1038/s41593-017-0056-2  
1174 (2018).

- 1175 37 Liu, H. *et al.* DNA Methylation Atlas of the Mouse Brain at Single-Cell Resolution.  
1176 *bioRxiv* (2020).
- 1177 38 Stuart, T. *et al.* Comprehensive Integration of Single-Cell Data. *Cell* **177**, 1888-  
1178 1902 e1821, doi:10.1016/j.cell.2019.05.031 (2019).
- 1179 39 Zhang, Y. *et al.* Model-based analysis of ChIP-Seq (MACS). *Genome Biol* **9**, R137,  
1180 doi:10.1186/gb-2008-9-9-r137 (2008).
- 1181 40 Harrow, J. *et al.* GENCODE: producing a reference annotation for ENCODE.  
1182 *Genome Biol* **7 Suppl 1**, S4 1-9, doi:10.1186/gb-2006-7-s1-s4 (2006).
- 1183 41 Consortium, E. P. A user's guide to the encyclopedia of DNA elements (ENCODE).  
1184 *PLoS Biol* **9**, e1001046, doi:10.1371/journal.pbio.1001046 (2011).
- 1185 42 Consortium, E. P. An integrated encyclopedia of DNA elements in the human  
1186 genome. *Nature* **489**, 57-74, doi:10.1038/nature11247 (2012).
- 1187 43 Shen, Y. *et al.* A map of the cis-regulatory sequences in the mouse genome.  
1188 *Nature* **488**, 116-120, doi:10.1038/nature11243 (2012).
- 1189 44 Yue, F. *et al.* A comparative encyclopedia of DNA elements in the mouse genome.  
1190 *Nature* **515**, 355-364, doi:10.1038/nature13992 (2014).
- 1191 45 Ernst, J. & Kellis, M. ChromHMM: automating chromatin-state discovery and  
1192 characterization. *Nat Methods* **9**, 215-216, doi:10.1038/nmeth.1906 (2012).
- 1193 46 Heinz, S. *et al.* Simple combinations of lineage-determining transcription factors  
1194 prime cis-regulatory elements required for macrophage and B cell identities. *Mol*  
1195 *Cell* **38**, 576-589, doi:10.1016/j.molcel.2010.05.004 (2010).
- 1196 47 Glasgow, S. M. *et al.* Mutual antagonism between Sox10 and NFIA regulates  
1197 diversification of glial lineages and glioma subtypes. *Nat Neurosci* **17**, 1322-1329,  
1198 doi:10.1038/nn.3790 (2014).
- 1199 48 Kolterud, A., Alenius, M., Carlsson, L. & Bohm, S. The Lim homeobox gene Lhx2  
1200 is required for olfactory sensory neuron identity. *Development* **131**, 5319-5326,  
1201 doi:10.1242/dev.01416 (2004).
- 1202 49 Pliner, H. A. *et al.* Cicero Predicts cis-Regulatory DNA Interactions from Single-  
1203 Cell Chromatin Accessibility Data. *Mol Cell* **71**, 858-871 e858,  
1204 doi:10.1016/j.molcel.2018.06.044 (2018).
- 1205 50 Kierdorf, K. *et al.* Microglia emerge from erythromyeloid precursors via Pu.1- and  
1206 Irf8-dependent pathways. *Nat Neurosci* **16**, 273-280, doi:10.1038/nn.3318 (2013).
- 1207 51 Nord, A. S., Pattabiraman, K., Visel, A. & Rubenstein, J. L. R. Genomic  
1208 perspectives of transcriptional regulation in forebrain development. *Neuron* **85**, 27-  
1209 47, doi:10.1016/j.neuron.2014.11.011 (2015).
- 1210 52 Yuan, F. *et al.* Efficient generation of region-specific forebrain neurons from human  
1211 pluripotent stem cells under highly defined condition. *Sci Rep* **5**, 18550,  
1212 doi:10.1038/srep18550 (2015).
- 1213 53 Roadmap Epigenomics, C. *et al.* Integrative analysis of 111 reference human  
1214 epigenomes. *Nature* **518**, 317-330, doi:10.1038/nature14248 (2015).
- 1215 54 Ong, C. T. & Corces, V. G. CTCF: an architectural protein bridging genome  
1216 topology and function. *Nat Rev Genet* **15**, 234-246, doi:10.1038/nrg3663 (2014).
- 1217 55 Hirayama, T., Tarusawa, E., Yoshimura, Y., Galjart, N. & Yagi, T. CTCF is required  
1218 for neural development and stochastic expression of clustered Pcdh genes in  
1219 neurons. *Cell Rep* **2**, 345-357, doi:10.1016/j.celrep.2012.06.014 (2012).

- 1220 56 Guo, Y. *et al.* CTCF/cohesin-mediated DNA looping is required for protocadherin  
1221 alpha promoter choice. *Proc Natl Acad Sci U S A* **109**, 21081-21086,  
1222 doi:10.1073/pnas.1219280110 (2012).
- 1223 57 Boillot, M. *et al.* LGI1 acts presynaptically to regulate excitatory synaptic  
1224 transmission during early postnatal development. *Sci Rep* **6**, 21769,  
1225 doi:10.1038/srep21769 (2016).
- 1226 58 Choksi, S. P., Lauter, G., Swoboda, P. & Roy, S. Switching on cilia: transcriptional  
1227 networks regulating ciliogenesis. *Development* **141**, 1427-1441,  
1228 doi:10.1242/dev.074666 (2014).
- 1229 59 Nakajima, K. *et al.* Molecular motor KIF5A is essential for GABA(A) receptor  
1230 transport, and KIF5A deletion causes epilepsy. *Neuron* **76**, 945-961,  
1231 doi:10.1016/j.neuron.2012.10.012 (2012).
- 1232 60 Assali, A., Harrington, A. J. & Cowan, C. W. Emerging roles for MEF2 in brain  
1233 development and mental disorders. *Curr Opin Neurobiol* **59**, 49-58,  
1234 doi:10.1016/j.conb.2019.04.008 (2019).
- 1235 61 Shi, Y. *et al.* Functional comparison of the effects of TARPs and cornichons on  
1236 AMPA receptor trafficking and gating. *Proc Natl Acad Sci U S A* **107**, 16315-16319,  
1237 doi:10.1073/pnas.1011706107 (2010).
- 1238 62 Lopez de Armentia, M. *et al.* cAMP response element-binding protein-mediated  
1239 gene expression increases the intrinsic excitability of CA1 pyramidal neurons. *J*  
1240 *Neurosci* **27**, 13909-13918, doi:10.1523/JNEUROSCI.3850-07.2007 (2007).
- 1241 63 Zhou, Y. *et al.* CREB regulates excitability and the allocation of memory to subsets  
1242 of neurons in the amygdala. *Nat Neurosci* **12**, 1438-1443, doi:10.1038/nn.2405  
1243 (2009).
- 1244 64 Mattson, M. P. & Camandola, S. NF-kappaB in neuronal plasticity and  
1245 neurodegenerative disorders. *J Clin Invest* **107**, 247-254, doi:10.1172/JCI11916  
1246 (2001).
- 1247 65 Dziennis, S. & Alkayed, N. J. Role of signal transducer and activator of  
1248 transcription 3 in neuronal survival and regeneration. *Rev Neurosci* **19**, 341-361,  
1249 doi:10.1515/revneuro.2008.19.4-5.341 (2008).
- 1250 66 Fontenot, M. R. *et al.* Novel transcriptional networks regulated by CLOCK in  
1251 human neurons. *Genes Dev* **31**, 2121-2135, doi:10.1101/gad.305813.117 (2017).
- 1252 67 Pickrell, J. K. Joint analysis of functional genomic data and genome-wide  
1253 association studies of 18 human traits. *Am J Hum Genet* **94**, 559-573,  
1254 doi:10.1016/j.ajhg.2014.03.004 (2014).
- 1255 68 Maurano, M. T. *et al.* Systematic localization of common disease-associated  
1256 variation in regulatory DNA. *Science* **337**, 1190-1195,  
1257 doi:10.1126/science.1222794 (2012).
- 1258 69 Tyner, C. *et al.* The UCSC Genome Browser database: 2017 update. *Nucleic Acids*  
1259 *Res* **45**, D626-D634, doi:10.1093/nar/gkw1134 (2017).
- 1260 70 Bulik-Sullivan, B. K. *et al.* LD Score regression distinguishes confounding from  
1261 polygenicity in genome-wide association studies. *Nat Genet* **47**, 291-295,  
1262 doi:10.1038/ng.3211 (2015).
- 1263 71 Skene, N. G. *et al.* Genetic identification of brain cell types underlying  
1264 schizophrenia. *Nat Genet* **50**, 825-833, doi:10.1038/s41588-018-0129-5 (2018).

- 1265 72 Volkow, N. D. & Morales, M. The Brain on Drugs: From Reward to Addiction. *Cell*  
1266 **162**, 712-725, doi:10.1016/j.cell.2015.07.046 (2015).
- 1267 73 Corces, M. R. *et al.* Single-cell epigenomic identification of inherited risk loci in  
1268 Alzheimer's and Parkinson's disease. *bioRxiv* (2020).
- 1269 74 initiative, B. BRAIN 2025 Report. (2014).
- 1270 75 Sullivan, P. F. & Geschwind, D. H. Defining the Genetic, Genomic, Cellular, and  
1271 Diagnostic Architectures of Psychiatric Disorders. *Cell* **177**, 162-183,  
1272 doi:10.1016/j.cell.2019.01.015 (2019).
- 1273 76 Canzio, D. & Maniatis, T. The generation of a protocadherin cell-surface  
1274 recognition code for neural circuit assembly. *Curr Opin Neurobiol* **59**, 213-220,  
1275 doi:10.1016/j.conb.2019.10.001 (2019).
- 1276 77 Zhang, D. *et al.* Identification of potential target genes for RFX4\_v3, a transcription  
1277 factor critical for brain development. *J Neurochem* **98**, 860-875,  
1278 doi:10.1111/j.1471-4159.2006.03930.x (2006).
- 1279 78 Gorkin, D. U. *et al.* Systematic mapping of chromatin state landscapes during  
1280 mouse development. *bioRxiv* (2017).
- 1281 79 Mich, J. K. *et al.* Functional enhancer elements drive subclass-selective  
1282 expression from mouse to primate neocortex. *bioRxiv* (2020).
- 1283 80 Leland McInnes, J. H., Nathaniel Saul, Lukas Großberger. UMAP: Uniform  
1284 Manifold Approximation and Projection. *Journal of Open Source Software* **3(29)**,  
1285 861, doi:<https://doi.org/10.21105/joss.00861> (2018).
- 1286 81 Siepel, A. *et al.* Evolutionarily conserved elements in vertebrate, insect, worm, and  
1287 yeast genomes. *Genome Res* **15**, 1034-1050, doi:10.1101/gr.3715005 (2005).
- 1288 82 Chen, E. Y. *et al.* Enrichr: interactive and collaborative HTML5 gene list enrichment  
1289 analysis tool. *BMC Bioinformatics* **14**, 128, doi:10.1186/1471-2105-14-128 (2013).
- 1290 83 Suzuki, R. & Shimodaira, H. Pvclust: an R package for assessing the uncertainty  
1291 in hierarchical clustering. *Bioinformatics* **22**, 1540-1542,  
1292 doi:10.1093/bioinformatics/btl117 (2006).
- 1293 84 Li, H. & Durbin, R. Fast and accurate short read alignment with Burrows-Wheeler  
1294 transform. *Bioinformatics* **25**, 1754-1760, doi:10.1093/bioinformatics/btp324  
1295 (2009).
- 1296 85 Ou, J. *et al.* ATACseqQC: a Bioconductor package for post-alignment quality  
1297 assessment of ATAC-seq data. *BMC Genomics* **19**, 169, doi:10.1186/s12864-018-  
1298 4559-3 (2018).
- 1299 86 Bouneffouf, D. B., I. Theoretical analysis of the Minimum Sum of Squared  
1300 Similarities sampling for Nyström-based spectral clustering. . *2016 International*  
1301 *Joint Conference on Neural Networks (IJCNN)*, 3856–3862,  
1302 doi:10.1109/ijcnn.2016.7727698 (2016).
- 1303 87 Traag, V. A., Waltman, L. & van Eck, N. J. From Louvain to Leiden: guaranteeing  
1304 well-connected communities. *Sci Rep* **9**, 5233, doi:10.1038/s41598-019-41695-z  
1305 (2019).
- 1306 88 Corces, M. R. *et al.* The chromatin accessibility landscape of primary human  
1307 cancers. *Science* **362**, doi:10.1126/science.aav1898 (2018).
- 1308 89 Quinlan, A. R. & Hall, I. M. BEDTools: a flexible suite of utilities for comparing  
1309 genomic features. *Bioinformatics* **26**, 841-842, doi:10.1093/bioinformatics/btq033  
1310 (2010).

- 1311 90 Li, Y. E. *et al.* Identification of high-confidence RNA regulatory elements by  
1312 combinatorial classification of RNA-protein binding sites. *Genome Biol* **18**, 169,  
1313 doi:10.1186/s13059-017-1298-8 (2017).
- 1314 91 Fabian Pedregosa, G. V., Alexandre Gramfort, Vincent Michel, Bertrand Thirion,  
1315 Olivier Grisel, Mathieu Blondel, Peter Prettenhofer, Ron Weiss, Vincent Dubourg,  
1316 Jake Vanderplas, Alexandre Passos, David Cournapeau, Matthieu Brucher,  
1317 Matthieu Perrot, Édouard Duchesnay. Scikit-learn: Machine Learning in Python.  
1318 *Journal of Machine Learning Research* **12(85)**, 2825–2830 (2011).
- 1319 92 Hoyer, P. O. Non-negative Matrix Factorization with Sparseness Constraints. *J.*  
1320 *Mach. Learn. Res.* **5**, 1457–1469 (2004).
- 1321 93 Kim, H. & Park, H. Sparse non-negative matrix factorizations via alternating non-  
1322 negativity-constrained least squares for microarray data analysis. *Bioinformatics*  
1323 **23**, 1495-1502, doi:10.1093/bioinformatics/btm134 (2007).
- 1324 94 McLean, C. Y. *et al.* GREAT improves functional interpretation of cis-regulatory  
1325 regions. *Nat Biotechnol* **28**, 495-501, doi:10.1038/nbt.1630 (2010).
- 1326 95 Delignette-Muller, M. L. & Dutang, C. fitdistrplus: An R Package for Fitting  
1327 Distributions. *2015* **64**, 34, doi:10.18637/jss.v064.i04 (2015).
- 1328 96 Arvanitis, M. *et al.* Genome-wide association and multi-omic analyses reveal  
1329 ACTN2 as a gene linked to heart failure. *Nat Commun* **11**, 1122,  
1330 doi:10.1038/s41467-020-14843-7 (2020).
- 1331 97 Aylward, A., Chiou, J., Okino, M.-L., Kadakia, N. & Gaulton, K. J. Shared genetic  
1332 contribution to type 1 and type 2 diabetes risk. *bioRxiv* (2018).
- 1333 98 Barban, N. *et al.* Genome-wide analysis identifies 12 loci influencing human  
1334 reproductive behavior. *Nat Genet* **48**, 1462-1472, doi:10.1038/ng.3698 (2016).
- 1335 99 Bentham, J. *et al.* Genetic association analyses implicate aberrant regulation of  
1336 innate and adaptive immunity genes in the pathogenesis of systemic lupus  
1337 erythematosus. *Nat Genet* **47**, 1457-1464, doi:10.1038/ng.3434 (2015).
- 1338 100 Cordell, H. J. *et al.* International genome-wide meta-analysis identifies new primary  
1339 biliary cirrhosis risk loci and targetable pathogenic pathways. *Nat Commun* **6**,  
1340 8019, doi:10.1038/ncomms9019 (2015).
- 1341 101 Deary, V. *et al.* Genetic contributions to self-reported tiredness. *Mol Psychiatry* **23**,  
1342 609-620, doi:10.1038/mp.2017.5 (2018).
- 1343 102 de Lange, K. M. *et al.* Genome-wide association study implicates immune  
1344 activation of multiple integrin genes in inflammatory bowel disease. *Nat Genet* **49**,  
1345 256-261, doi:10.1038/ng.3760 (2017).
- 1346 103 Demenais, F. *et al.* Multiancestry association study identifies new asthma risk loci  
1347 that colocalize with immune-cell enhancer marks. *Nat Genet* **50**, 42-53,  
1348 doi:10.1038/s41588-017-0014-7 (2018).
- 1349 104 Demontis, D. *et al.* Discovery of the first genome-wide significant risk loci for  
1350 attention deficit/hyperactivity disorder. *Nat Genet* **51**, 63-75, doi:10.1038/s41588-  
1351 018-0269-7 (2019).
- 1352 105 den Hoed, M. *et al.* Identification of heart rate-associated loci and their effects on  
1353 cardiac conduction and rhythm disorders. *Nat Genet* **45**, 621-631,  
1354 doi:10.1038/ng.2610 (2013).
- 1355 106 Dubois, P. C. *et al.* Multiple common variants for celiac disease influencing  
1356 immune gene expression. *Nat Genet* **42**, 295-302, doi:10.1038/ng.543 (2010).



- 1357 107 Dupuis, J. *et al.* New genetic loci implicated in fasting glucose homeostasis and  
1358 their impact on type 2 diabetes risk. *Nat Genet* **42**, 105-116, doi:10.1038/ng.520  
1359 (2010).
- 1360 108 Pappa, I. *et al.* A genome-wide approach to children's aggressive behavior: The  
1361 EAGLE consortium. *Am J Med Genet B Neuropsychiatr Genet* **171**, 562-572,  
1362 doi:10.1002/ajmg.b.32333 (2016).
- 1363 109 Paternoster, L. *et al.* Multi-ancestry genome-wide association study of 21,000  
1364 cases and 95,000 controls identifies new risk loci for atopic dermatitis. *Nat Genet*  
1365 **47**, 1449-1456, doi:10.1038/ng.3424 (2015).
- 1366 110 Ferreira, M. A. *et al.* Shared genetic origin of asthma, hay fever and eczema  
1367 elucidates allergic disease biology. *Nat Genet* **49**, 1752-1757,  
1368 doi:10.1038/ng.3985 (2017).
- 1369 111 Willer, C. J. *et al.* Discovery and refinement of loci associated with lipid levels. *Nat*  
1370 *Genet* **45**, 1274-1283, doi:10.1038/ng.2797 (2013).
- 1371 112 Grove, J. *et al.* Identification of common genetic risk variants for autism spectrum  
1372 disorder. *Nat Genet* **51**, 431-444, doi:10.1038/s41588-019-0344-8 (2019).
- 1373 113 Horikoshi, M. *et al.* Genome-wide associations for birth weight and correlations  
1374 with adult disease. *Nature* **538**, 248-252, doi:10.1038/nature19806 (2016).
- 1375 114 Hou, L. *et al.* Genome-wide association study of 40,000 individuals identifies two  
1376 novel loci associated with bipolar disorder. *Hum Mol Genet* **25**, 3383-3394,  
1377 doi:10.1093/hmg/ddw181 (2016).
- 1378 115 International Multiple Sclerosis Genetics, C. *et al.* Genetic risk and a primary role  
1379 for cell-mediated immune mechanisms in multiple sclerosis. *Nature* **476**, 214-219,  
1380 doi:10.1038/nature10251 (2011).
- 1381 116 Jansen, P. R. *et al.* Genome-wide analysis of insomnia in 1,331,010 individuals  
1382 identifies new risk loci and functional pathways. *Nat Genet* **51**, 394-403,  
1383 doi:10.1038/s41588-018-0333-3 (2019).
- 1384 117 Jiang, X. *et al.* Genome-wide association study in 79,366 European-ancestry  
1385 individuals informs the genetic architecture of 25-hydroxyvitamin D levels. *Nat*  
1386 *Commun* **9**, 260, doi:10.1038/s41467-017-02662-2 (2018).
- 1387 118 Ji, S. G. *et al.* Genome-wide association study of primary sclerosing cholangitis  
1388 identifies new risk loci and quantifies the genetic relationship with inflammatory  
1389 bowel disease. *Nat Genet* **49**, 269-273, doi:10.1038/ng.3745 (2017).
- 1390 119 Jin, Y. *et al.* Genome-wide association studies of autoimmune vitiligo identify 23  
1391 new risk loci and highlight key pathways and regulatory variants. *Nat Genet* **48**,  
1392 1418-1424, doi:10.1038/ng.3680 (2016).
- 1393 120 Jones, S. E. *et al.* Genome-Wide Association Analyses in 128,266 Individuals  
1394 Identifies New Morningness and Sleep Duration Loci. *PLoS Genet* **12**, e1006125,  
1395 doi:10.1371/journal.pgen.1006125 (2016).
- 1396 121 Lambert, J. C. *et al.* Meta-analysis of 74,046 individuals identifies 11 new  
1397 susceptibility loci for Alzheimer's disease. *Nat Genet* **45**, 1452-1458,  
1398 doi:10.1038/ng.2802 (2013).
- 1399 122 Locke, A. E. *et al.* Genetic studies of body mass index yield new insights for obesity  
1400 biology. *Nature* **518**, 197-206, doi:10.1038/nature14177 (2015).

- 1401 123 Luciano, M. *et al.* Association analysis in over 329,000 individuals identifies 116  
1402 independent variants influencing neuroticism. *Nat Genet* **50**, 6-11,  
1403 doi:10.1038/s41588-017-0013-8 (2018).
- 1404 124 Mahajan, A. *et al.* Fine-mapping type 2 diabetes loci to single-variant resolution  
1405 using high-density imputation and islet-specific epigenome maps. *Nat Genet* **50**,  
1406 1505-1513, doi:10.1038/s41588-018-0241-6 (2018).
- 1407 125 Malik, R. *et al.* Multiancestry genome-wide association study of 520,000 subjects  
1408 identifies 32 loci associated with stroke and stroke subtypes. *Nat Genet* **50**, 524-  
1409 537, doi:10.1038/s41588-018-0058-3 (2018).
- 1410 126 Manning, A. K. *et al.* A genome-wide approach accounting for body mass index  
1411 identifies genetic variants influencing fasting glycemic traits and insulin resistance.  
1412 *Nat Genet* **44**, 659-669, doi:10.1038/ng.2274 (2012).
- 1413 127 Marinelli, M. *et al.* Heritability and Genome-Wide Association Analyses of Sleep  
1414 Duration in Children: The EAGLE Consortium. *Sleep* **39**, 1859-1869,  
1415 doi:10.5665/sleep.6170 (2016).
- 1416 128 Nelson, C. P. *et al.* Association analyses based on false discovery rate implicate  
1417 new loci for coronary artery disease. *Nat Genet* **49**, 1385-1391,  
1418 doi:10.1038/ng.3913 (2017).
- 1419 129 Nielsen, J. B. *et al.* Biobank-driven genomic discovery yields new insight into atrial  
1420 fibrillation biology. *Nat Genet* **50**, 1234-1239, doi:10.1038/s41588-018-0171-3  
1421 (2018).
- 1422 130 Okada, Y. *et al.* Genetics of rheumatoid arthritis contributes to biology and drug  
1423 discovery. *Nature* **506**, 376-381, doi:10.1038/nature12873 (2014).
- 1424 131 Okbay, A. *et al.* Genome-wide association study identifies 74 loci associated with  
1425 educational attainment. *Nature* **533**, 539-542, doi:10.1038/nature17671 (2016).
- 1426 132 Pattaro, C. *et al.* Genetic associations at 53 loci highlight cell types and biological  
1427 pathways relevant for kidney function. *Nat Commun* **7**, 10023,  
1428 doi:10.1038/ncomms10023 (2016).
- 1429 133 International Obsessive Compulsive Disorder Foundation Genetics, C. & Studies,  
1430 O. C. D. C. G. A. Revealing the complex genetic architecture of obsessive-  
1431 compulsive disorder using meta-analysis. *Mol Psychiatry* **23**, 1181-1188,  
1432 doi:10.1038/mp.2017.154 (2018).
- 1433 134 Duncan, L. E. *et al.* Largest GWAS of PTSD (N=20 070) yields genetic overlap  
1434 with schizophrenia and sex differences in heritability. *Mol Psychiatry* **23**, 666-673,  
1435 doi:10.1038/mp.2017.77 (2018).
- 1436 135 Schizophrenia Working Group of the Psychiatric Genomics, C. Biological insights  
1437 from 108 schizophrenia-associated genetic loci. *Nature* **511**, 421-427,  
1438 doi:10.1038/nature13595 (2014).
- 1439 136 Day, F. R. *et al.* Large-scale genomic analyses link reproductive aging to  
1440 hypothalamic signaling, breast cancer susceptibility and BRCA1-mediated DNA  
1441 repair. *Nat Genet* **47**, 1294-1303, doi:10.1038/ng.3412 (2015).
- 1442 137 Day, F. R. *et al.* Genomic analyses identify hundreds of variants associated with  
1443 age at menarche and support a role for puberty timing in cancer risk. *Nat Genet*  
1444 **49**, 834-841, doi:10.1038/ng.3841 (2017).

- 1445 138 Zhou, W. *et al.* Efficiently controlling for case-control imbalance and sample  
1446 relatedness in large-scale genetic association studies. *Nat Genet* **50**, 1335-1341,  
1447 doi:10.1038/s41588-018-0184-y (2018).
- 1448 139 Savage, J. E. *et al.* Genome-wide association meta-analysis in 269,867 individuals  
1449 identifies new genetic and functional links to intelligence. *Nat Genet* **50**, 912-919,  
1450 doi:10.1038/s41588-018-0152-6 (2018).
- 1451 140 Schumann, G. *et al.* KLB is associated with alcohol drinking, and its gene product  
1452 beta-Klotho is necessary for FGF21 regulation of alcohol preference. *Proc Natl  
1453 Acad Sci U S A* **113**, 14372-14377, doi:10.1073/pnas.1611243113 (2016).
- 1454 141 Strawbridge, R. J. *et al.* Genome-wide association identifies nine common variants  
1455 associated with fasting proinsulin levels and provides new insights into the  
1456 pathophysiology of type 2 diabetes. *Diabetes* **60**, 2624-2634, doi:10.2337/db11-  
1457 0415 (2011).
- 1458 142 Taal, H. R. *et al.* Common variants at 12q15 and 12q24 are associated with infant  
1459 head circumference. *Nat Genet* **44**, 532-538, doi:10.1038/ng.2238 (2012).
- 1460 143 Teumer, A. *et al.* Genome-wide Association Studies Identify Genetic Loci  
1461 Associated With Albuminuria in Diabetes. *Diabetes* **65**, 803-817,  
1462 doi:10.2337/db15-1313 (2016).
- 1463 144 van den Berg, S. M. *et al.* Meta-analysis of Genome-Wide Association Studies for  
1464 Extraversion: Findings from the Genetics of Personality Consortium. *Behav Genet*  
1465 **46**, 170-182, doi:10.1007/s10519-015-9735-5 (2016).
- 1466 145 van der Valk, R. J. *et al.* A novel common variant in DCST2 is associated with  
1467 length in early life and height in adulthood. *Hum Mol Genet* **24**, 1155-1168,  
1468 doi:10.1093/hmg/ddu510 (2015).
- 1469 146 van Rheenen, W. *et al.* Genome-wide association analyses identify new risk  
1470 variants and the genetic architecture of amyotrophic lateral sclerosis. *Nat Genet*  
1471 **48**, 1043-1048, doi:10.1038/ng.3622 (2016).
- 1472 147 Watson, H. J. *et al.* Genome-wide association study identifies eight risk loci and  
1473 implicates metabo-psychiatric origins for anorexia nervosa. *Nat Genet* **51**, 1207-  
1474 1214, doi:10.1038/s41588-019-0439-2 (2019).
- 1475 148 Wheeler, E. *et al.* Impact of common genetic determinants of Hemoglobin A1c on  
1476 type 2 diabetes risk and diagnosis in ancestrally diverse populations: A transethnic  
1477 genome-wide meta-analysis. *PLoS Med* **14**, e1002383,  
1478 doi:10.1371/journal.pmed.1002383 (2017).
- 1479 149 Wray, N. R. *et al.* Genome-wide association analyses identify 44 risk variants and  
1480 refine the genetic architecture of major depression. *Nat Genet* **50**, 668-681,  
1481 doi:10.1038/s41588-018-0090-3 (2018).
- 1482 150 Yengo, L. *et al.* Meta-analysis of genome-wide association studies for height and  
1483 body mass index in approximately 700000 individuals of European ancestry. *Hum  
1484 Mol Genet* **27**, 3641-3649, doi:10.1093/hmg/ddy271 (2018).
